# Supplementary material
Source: publisher figshare collection journal article supplement (https://gsapubs.figshare.com/ndownloader/files/30991105)
Supplement: Supplementary file 1 [file 30991105]

## Sheet: Table S1
TABLE S1. METADATA FOR ZIRCON LA-ICP-MS U-Pb ANALYSES
Laboratory and Sample Preparation
Laboratory name	Boise State University Isotope Geology Laboratory
Sample type/mineral	Zircon
Sample preparation	Conventional mineral separation, 1 inch resin mount, 0.3 µm polish to finish
Imaging	BSE, JEOL T300, 10 nA, 17 mm working distance
Laser ablation system
Make, model and type	ESI/New Wave Research, UP213
Ablation cell and volume	Standard ablation cell
Laser wavelength (nm)	213 nm
Pulse width (ns)	4 ns
Fluence (J cm-2)	~5 J cm-2
Repetition rate (Hz)	5 Hz
Ablation duration (s)	30 s
Ablation pit depth / ablation rate	30 µm pit depth, measured using an optical microscope, equivalent to 0.1 mm/pulse
Spot diameter (mm)	25 µm
Sampling mode / pattern	Static spot ablation
Carrier gas	100% He in the cell, Ar make-up gas combined using a Y-piece 70 cm from the torch.
Cell carrier gas flow (l min-1)	1.15 l min-1
ICP-MS Instrument
Make, Model and type	ThermoElectron, X-series II, quadrupole
Sample introduction	Ablation aerosol transported through 190 cm long, 1.5 cm dia. tygon tubing coil
RF power (W)	1400 W
Make-up gas flow (l min-1)	0.74 l min-1 Ar
Detection system	single ion-counting SEM
Masses measured and dwell times per peak (ms)	29,91(5); 31,89,93,139,140,141,146,147,153,157,159,163,165,166,169,172,175,177,181(10); 202,204,208,232,238(40); 206(80); 49,207(200)
Total integration time	~0.895 s
‘Sensitivity’ as useful yield (%)	0.01% U [(#ions detected/#atoms sampled)*100; Schaltegger et al., 2015]
IC Dead time (ns)	29 ns
Data Processing
Gas blank	30 s on-peak zero subtracted
Calibration strategy	PL (Plešovice) used as primary reference material, Temora used as validation
Reference Material info	Plešovice (Sláma et al., 2008); 336.9 Ma (206Pb/238U) Temora (Black et al., 2004); 416.78 Ma (206Pb/238U)
Data processing package used / Correction for LIEF	ThermoElectron Plasmalab TRA software for integrated cps acquisition; in-house Microsoft VBA coded spreadsheet for data normalisation, concentration calibration, uncertainty propagation and age calculation.
Mass discrimination	207Pb/206Pb and 206Pb/238U normalised to reference material.
Common-Pb correction, composition and uncertainty	No common-Pb correction applied; ablation sweeps with mass 204 signals above background rejected.
Uncertainty level and propagation	Ages are quoted at 2σ absolute, propagation is by quadratic addition. Isotope ratio and apparent age errors do not include systematic calibration errors of 0.37% (207Pb/206Pb), 0.80% (206Pb/238U) (1σ).
Quality control / Validation	PL – Weighted average 206Pb/238U age = 337 ± 12 (2σ, MSWD = 0.093, n = 20) Temora – Weighted average 206Pb/238U age = 419 ± 20 (2σ, MSWD = 0.55, n = 12)

## Sheet: Table S2
TABLE S2. ZIRCON U-Pb ISOTOPE RATIOS AND TRACE ELEMENT CONCENTRATIONS BY LA-ICPMS: SAMPLE DATA
Analysis	Isotopic Data														Dates											Concentrations																						Experiment
	U	Th/U	206Pb	206Pb/204Pb	207Pb/235U	±2σ	206Pb/238U	±2σ	error corr.†	238U/206Pb	±2σ	207Pb/206Pb	±2σ		207Pb/206Pb	±2σ	±2σ,sys§	207Pb/235U	±2σ	±2σ,sys§	206Pb/238U	±2σ	±2σ,sys§	discordance		P	Ti	Y	Nb	La	Ce	Pr	Nd	Sm	Eu	Gd	Tb	Dy	Ho	Er	Tm	Yb	Lu	Hf	Ta	Th	U
	(ppm)		(cps)			(%)		(%)			(%)		(%)		(Ma)	(Ma)	(Ma)	(Ma)	(Ma)	(Ma)	(Ma)	(Ma)	(Ma)	(%)		(ppm)	(ppm)	(ppm)	(ppm)	(ppm)	(ppm)	(ppm)	(ppm)	(ppm)	(ppm)	(ppm)	(ppm)	(ppm)	(ppm)	(ppm)	(ppm)	(ppm)	(ppm)	(ppm)	(ppm)	(ppm)	(ppm)
12VD-80 L 1 12/5/2013 3:17:57 PM	341.329	0.406704	37051.1	15131.1	1.72759	4.3781	0.166719	3.94591	0.885141	5.99811	3.94591	0.0751543	1.89672		1072.62	38.0993	40.9464	1018.85	28.1564	30.328	994.01	36.3483	39.1718	7.32845		111.811	6.19491	274.537	2.5366	0.00772121	27.5495	0.0473372	0.612817	1.59873	0.271076	6.75659	2.37396	26.8356	9.47737	41.4506	10.7947	133.274	16.0866	9562.35	2.1639	138.82	341.329	zircon_05Dec13_Devonian_Wetteldorf.csv
12VD-80 L 10 12/5/2013 3:33:16 PM	159.205	0.46185	16327.9	1475.26	1.55477	5.41822	0.161197	4.41016	0.802321	6.20358	4.41016	0.0699533	3.14763		926.966	64.6458	66.4342	952.392	33.4812	35.2401	963.427	39.4661	42.0305	-3.9333		213.291	13.9151	716.917	7.43659	b.d.	34.5465	0.0688951	1.00853	3.65069	0.464118	15.8624	5.69486	69.1611	25.3107	116.742	30.2562	335.264	42.2952	10654.4	4.07142	73.5291	159.205	zircon_05Dec13_Devonian_Wetteldorf.csv
12VD-80 L 2 12/5/2013 3:19:39 PM	190.05	0.257083	7373.88	921.249	0.490884	6.35753	0.0624486	4.35947	0.67566	16.0132	4.35947	0.0570106	4.62743		491.968	102.04	103.36	405.513	21.2546	22.0866	390.5	16.5184	17.64	20.625		1114.47	6.73359	2430.44	2.48753	b.d.	5.03484	b.d.	0.305839	2.59999	0.910573	21.8485	12.6451	209.523	85.3893	434.305	120.905	1395.2	156.778	10282.1	1.30635	48.8588	190.05	zircon_05Dec13_Devonian_Wetteldorf.csv
12VD-80 L 3 12/5/2013 3:21:21 PM	53.3254	0.66435	3159.4	293.025	0.762989	8.76497	0.0954148	5.11713	0.577604	10.4806	5.11713	0.0579965	7.11615		529.627	155.914	156.769	575.733	38.5167	39.3225	587.482	28.7331	30.1733	-10.9238		179.214	20.3034	1633.42	3.23484	0.0347719	4.09742	0.557264	8.35253	15.7566	1.82076	69.5708	19.5594	215.75	66.571	244.975	53.5485	508.651	52.6877	6763.79	1.94771	35.4268	53.3254	zircon_05Dec13_Devonian_Wetteldorf.csv
12VD-80 L 4 12/5/2013 3:23:04 PM	21.096	0.436612	1917.82	194.583	1.61693	8.99536	0.144314	5.66142	0.623902	6.92934	5.66142	0.081261	6.99034		1227.77	137.253	138.033	976.801	56.4349	57.5583	869.01	46.0263	47.9233	29.2205		209.916	21.4528	427.739	2.11151	b.d.	7.96825	0.0357458	0.498716	1.56879	0.227339	9.21716	3.79672	44.2382	16.6881	67.1341	17.9269	201.616	19.0969	8463.76	0.891189	9.21076	21.096	zircon_05Dec13_Devonian_Wetteldorf.csv
12VD-80 L 5 12/5/2013 3:24:45 PM	218.941	0.510997	20422.4	13411.6	1.53326	6.06807	0.156731	5.51311	0.900221	6.38036	5.51311	0.0709511	2.53518		956.006	51.8335	54.0324	943.805	37.2921	38.8549	938.584	48.1545	50.1674	1.82235		297.465	11.1551	1929.33	3.22838	b.d.	12.4106	0.191273	6.4524	14.0336	0.641252	64.3651	20.8117	227.554	70.4147	283.352	68.3996	719.254	67.9648	7861.11	1.89277	111.878	218.941	zircon_05Dec13_Devonian_Wetteldorf.csv
12VD-80 L 6 12/5/2013 3:26:27 PM	229.95	0.357835	21986.6	5112.55	1.57332	6.18	0.161427	5.16144	0.826459	6.19475	5.16144	0.070687	3.39882		948.367	69.5735	71.23	959.736	38.3655	39.9121	964.702	46.2459	48.4372	-1.72242		268.208	10.2661	998.295	6.25637	b.d.	12.5501	0.0892793	1.99766	6.06517	0.126363	27.9368	9.39524	117.317	38.3226	162.75	40.2725	456.851	42.9343	8770.91	3.84562	82.2841	229.95	zircon_05Dec13_Devonian_Wetteldorf.csv
12VD-80 L 7 12/5/2013 3:28:09 PM	113.72	0.402691	12617.9	8286.34	2.00558	4.23653	0.182543	4.04359	0.938216	5.47817	4.04359	0.0796845	1.26398		1189.19	24.9566	28.9784	1117.4	28.7046	31.1512	1080.85	40.2377	43.3571	9.1103		213.482	15.6185	527.794	2.24621	b.d.	5.89583	0.0523966	0.991383	2.15451	0.152803	13.4617	4.83779	58.601	20.6134	84.1169	23.1671	251.815	25.3523	7620.51	1.03774	45.7942	113.72	zircon_05Dec13_Devonian_Wetteldorf.csv
12VD-80 L 8 12/5/2013 3:29:51 PM	144.19	0.389871	20751.6	3970.5	3.25103	5.10239	0.249184	4.67313	0.904208	4.01309	4.67313	0.0946234	2.04847		1520.58	38.6245	41.1046	1469.42	39.6215	41.9463	1434.27	60.0926	63.5544	5.67607		217.58	5.61529	1012.4	3.6611	b.d.	4.59672	0.0051171	1.1955	3.34562	0.569057	20.4785	8.2613	106.516	38.5697	165.425	40.5085	432.048	44.4532	8286.63	2.03239	56.2153	144.19	zircon_05Dec13_Devonian_Wetteldorf.csv
12VD-80 L 9 12/5/2013 3:31:34 PM	68.3234	0.611706	6899.98	792.398	1.56114	6.34548	0.158239	4.80407	0.747966	6.31955	4.80407	0.0715527	4.14561		973.22	84.537	85.8935	954.919	39.2738	40.8131	946.984	42.31	44.6837	2.69573		265.617	25.0892	685.506	4.48218	b.d.	29.7156	0.0492445	1.74724	3.6329	0.806515	18.4217	5.86115	69.9364	25.5927	111.868	29.5103	310.959	36.8079	9813.94	2.44683	41.7938	68.3234	zircon_05Dec13_Devonian_Wetteldorf.csv
12VD-80 M 11 12/5/2013 3:38:36 PM	59.6952	0.516992	5327.03	1238.69	1.53238	9.76312	0.164971	7.70033	0.785025	6.06168	7.70033	0.0673689	6.00194		849.201	124.777	125.735	943.454	59.9869	60.992	984.342	70.2942	71.857	-15.9139		224.77	15.3315	645.746	2.07165	b.d.	5.68372	b.d.	1.36609	3.45636	0.337085	15.7855	6.09198	74.7114	25.7514	108.193	25.2711	286.851	29.5711	8567.45	1.11965	30.862	59.6952	zircon_05Dec13_Devonian_Wetteldorf.csv
12VD-80 M 12 12/5/2013 3:40:18 PM	164.343	0.387701	16520.6	10849.2	2.01167	6.34332	0.187012	5.40374	0.843785	5.34726	5.40374	0.0780165	3.32224		1147.27	65.9997	67.6383	1119.45	43.0225	44.6792	1105.17	54.8815	57.276	3.66971		195.23	8.68311	648.412	2.55411	b.d.	6.44386	b.d.	0.885588	2.45768	0.246536	16.381	5.94774	68.0043	23.7984	106.019	26.3996	297.793	31.8145	7978.03	1.58672	63.7157	164.343	zircon_05Dec13_Devonian_Wetteldorf.csv
12VD-80 M 13 12/5/2013 3:42:00 PM	293.989	0.137626	23403.2	1286.64	1.58188	6.77783	0.142591	5.90117	0.863724	7.01304	5.90117	0.0804595	3.33394		1208.26	65.6459	67.2638	963.107	42.1655	43.5741	859.3	47.4743	49.1923	28.8811		253.588	2.80872	427.453	2.45629	0.120537	9.85757	0.266574	3.28962	1.68824	0.428748	6.68739	2.18329	36.0382	14.0646	71.6668	21.6985	268.563	32.1243	9590.52	0.866774	40.4605	293.989	zircon_05Dec13_Devonian_Wetteldorf.csv
12VD-80 M 14 12/5/2013 3:43:42 PM	36.4801	0.484254	3206.21	386.831	1.62559	8.00257	0.162254	6.28543	0.779916	6.16319	6.28543	0.0726635	4.95323		1004.56	100.523	101.652	980.156	50.3088	51.5612	969.289	56.5649	58.4476	3.51136		233.425	21.9051	521.312	2.78053	b.d.	20.8257	0.0748574	0.695755	1.61106	0.524936	12.7424	4.38369	55.8502	20.0059	83.8566	22.168	263.329	28.0205	8034.07	1.3491	17.6656	36.4801	zircon_05Dec13_Devonian_Wetteldorf.csv
12VD-80 M 15 12/5/2013 3:45:25 PM	16.0185	0.594747	1425.68	178.115	1.46789	10.9872	0.154536	6.97994	0.631663	6.47099	6.97994	0.0688909	8.48528		895.467	175.127	175.799	917.259	66.3569	67.2406	926.34	60.2271	61.8629	-3.44766		183.445	30.7644	472.275	0.800249	b.d.	3.86744	b.d.	0.761713	2.3776	0.461844	11.1014	4.22191	52.1474	17.1568	76.1949	17.942	212.62	22.1969	7911.63	0.321388	9.52697	16.0185	zircon_05Dec13_Devonian_Wetteldorf.csv
12VD-80 M 16 12/5/2013 3:47:07 PM	265.938	0.559525	9542.51	755.313	0.501582	6.07272	0.0611066	3.96483	0.64139	16.3648	3.96483	0.0595322	4.59978		586.647	99.8111	101.109	412.773	20.5971	21.4695	382.352	14.7188	15.9052	34.8241		426.622	10.0161	3139.81	2.20174	2.22978	9.98975	1.10184	13.6446	23.018	4.28485	107.528	34.6887	394.078	135.718	513.942	116.822	1229.53	130.143	6350.24	0.715299	148.799	265.938	zircon_05Dec13_Devonian_Wetteldorf.csv
12VD-80 M 17 12/5/2013 3:48:49 PM	302.939	0.0335508	29760.6	3019.52	1.78403	4.57305	0.173634	3.77858	0.81025	5.75925	3.77858	0.0745191	2.57586		1055.57	51.8732	53.9943	1039.65	29.7553	31.8726	1032.1	36.037	39.0977	2.22331		335.817	5.44494	392.252	0.939516	b.d.	0.553648	0.135802	0.857966	1.44234	0.126198	5.97744	3.17387	40.7987	12.9702	53.1964	15.3631	178.081	18.604	8811.94	1.30061	10.1639	302.939	zircon_05Dec13_Devonian_Wetteldorf.csv
12VD-80 M 18 12/5/2013 3:50:31 PM	193.551	1.48957	20518.3	3925.85	1.7764	5.58159	0.177075	3.57846	0.627263	5.64732	3.57846	0.0727583	4.28355		1007.22	86.8963	88.1972	1036.87	36.2616	38.0388	1050.98	34.7031	38.0326	-4.3439		296.17	9.74635	1447.66	2.84626	0.201912	68.7939	1.41794	29.7064	43.6389	13.2954	105.233	24.6009	221.77	58.1742	207.73	42.9767	455.89	44.4987	5490.4	0.736914	288.308	193.551	zircon_05Dec13_Devonian_Wetteldorf.csv
12VD-80 M 19 12/5/2013 3:52:13 PM	193.631	0.604685	18554.5	3550.11	1.6459	3.77191	0.169105	1.99932	0.493372	5.9135	1.99932	0.0705905	3.19844		945.571	65.5001	67.248	987.979	23.8244	26.3205	1007.18	18.6425	23.9211	-6.5152		113.148	8.25908	386.785	5.85392	b.d.	44.7278	0.0473209	0.549774	1.20182	0.527127	7.60917	2.74142	35.6813	12.8619	62.2969	18.5442	256.452	31.5482	8838.7	2.09545	117.086	193.631	zircon_05Dec13_Devonian_Wetteldorf.csv
12VD-80 M 20 12/5/2013 3:53:55 PM	196.355	0.633153	19175.5	1682.71	1.60692	7.33173	0.166389	6.33006	0.857421	6.01003	6.33006	0.0700437	3.69926		929.645	75.9425	77.4619	972.909	45.8884	47.2066	992.183	58.2112	60.0558	-6.72702		104.102	5.66245	373.312	6.76931	b.d.	42.5243	b.d.	0.482662	1.503	0.286922	6.14028	2.2144	28.4494	11.4422	59.2109	18.9443	261.086	35.315	8868.65	2.09839	124.323	196.355	zircon_05Dec13_Devonian_Wetteldorf.csv
12VD-80 M 21 12/5/2013 4:02:40 PM	400.204	0.355913	62204.6	854.236	4.04445	8.47317	0.258879	7.05975	0.828575	3.86281	7.05975	0.113308	4.68557		1853.15	84.6942	85.7523	1643.18	68.9797	70.3652	1484.11	93.5881	95.7791	19.9143		762.256	9.1941	1101.42	1.79834	9.51235	30.2673	4.43957	25.4192	13.9469	2.69091	30.92	9.81054	122.379	41.4669	169.046	42.2511	459.351	45.4019	8500.5	1.21936	142.438	400.204	zircon_05Dec13_Devonian_Wetteldorf.csv
12VD-80 M 22 12/5/2013 4:04:22 PM	347.61	0.258232	28932.9	11815.8	1.3255	5.49865	0.137123	4.80782	0.863928	7.29272	4.80782	0.0701081	2.66834		931.518	54.7631	56.8453	856.917	31.8236	33.4019	828.373	37.374	39.3598	11.0728		406.623	4.66321	1189.64	7.27179	0.0128165	10.5069	0.0418103	1.24485	3.20504	0.0919112	22.5875	9.41416	120.41	45.1888	194.785	50.0603	531.335	55.2863	9409.46	4.36307	89.7641	347.61	zircon_05Dec13_Devonian_Wetteldorf.csv
12VD-80 M 23 12/5/2013 4:06:04 PM	90.3292	0.452821	8228.02	3360.2	1.48622	9.02891	0.156862	7.51677	0.828459	6.37502	7.51677	0.068717	5.00195		890.253	103.319	104.451	924.776	54.8036	55.8627	939.317	65.7032	67.2147	-5.51117		222.187	5.88428	1246.95	2.21598	b.d.	3.44556	0.332653	5.32283	10.1125	2.27387	49.4298	15.1898	159.796	50.5516	180.976	40.529	397.517	40.1635	7019.92	1.04806	40.903	90.3292	zircon_05Dec13_Devonian_Wetteldorf.csv
12VD-80 M 24 12/5/2013 4:07:45 PM	105.358	0.41562	9079.07	1737.14	1.52769	9.50175	0.163793	6.5581	0.685776	6.10527	6.5581	0.0676454	6.87565		857.714	142.749	143.579	941.57	58.3102	59.3267	977.821	59.4998	61.2879	-14.0032		208.17	16.2062	564.265	5.48981	b.d.	26.6952	b.d.	1.24074	1.37295	0.338906	14.4457	4.60182	57.5838	21.5894	92.1624	26.7317	303.945	34.6235	9469.41	3.07164	43.789	105.358	zircon_05Dec13_Devonian_Wetteldorf.csv
12VD-80 M 25 12/5/2013 4:09:27 PM	33.3443	0.778695	2844.59	264.464	1.53622	11.2647	0.15772	7.87833	0.696277	6.34035	7.87833	0.0706425	8.05143		947.076	164.845	165.544	944.992	69.2813	70.1515	944.093	69.1887	70.6539	0.31492		271.141	34.6557	802.571	2.20423	b.d.	21.0886	0.217575	2.69631	6.13976	2.36883	27.8631	8.49139	97.5273	30.7016	124.611	28.5002	330.057	35.0134	7405.76	0.843431	25.965	33.3443	zircon_05Dec13_Devonian_Wetteldorf.csv
12VD-80 M 26 12/5/2013 4:11:09 PM	278.939	0.353694	28488.5	8442.06	2.14349	5.20459	0.191923	4.78469	0.908263	5.21042	4.78469	0.0810016	2.04803		1221.47	40.2492	42.8106	1162.95	36.0351	38.0223	1131.78	49.6651	52.3263	7.34245		203.582	11.4074	779.562	2.42449	b.d.	8.21731	0.0266141	0.666296	2.33905	0.156953	16.4183	6.57193	77.442	28.0163	125.237	32.0596	353.273	37.584	9064.92	1.51092	98.6591	278.939	zircon_05Dec13_Devonian_Wetteldorf.csv
12VD-80 M 27 12/5/2013 4:12:52 PM	82.9881	1.34488	3496.71	298.662	1.29163	10.599	0.0660008	7.35994	0.690871	15.1513	7.35994	0.141935	7.62691		2250.94	131.738	132.36	842.021	60.658	61.5162	412.016	29.3754	30.0855	81.6958		148.985	63.7478	701.606	1.64521	1.51981	16.3137	0.375915	4.1888	6.86453	1.44837	20.4606	6.92579	75.2443	25.6379	110.718	28.3662	327.198	36.6476	6278.84	0.424644	111.609	82.9881	zircon_05Dec13_Devonian_Wetteldorf.csv
12VD-80 M 28 12/5/2013 4:14:34 PM	82.5832	0.502744	8711.18	14596.1	2.07201	7.09574	0.193799	5.16583	0.72051	5.15998	5.16583	0.0775421	4.86454		1135.16	96.8103	97.9297	1139.6	48.5956	50.1026	1141.92	54.0604	56.6528	-0.595877		303.174	16.7363	1308.33	1.85852	b.d.	4.10416	0.23778	5.14105	9.75898	1.49898	44.5939	14.8412	158.637	50.1267	193.313	47.0565	497.431	47.8626	7085.58	0.902687	41.5182	82.5832	zircon_05Dec13_Devonian_Wetteldorf.csv
12VD-80 M 29 12/5/2013 4:16:16 PM	76.7299	0.458503	6297.02	2071.96	1.41135	7.36149	0.141885	6.05085	0.815785	7.04795	6.05085	0.0721432	4.19269		989.983	85.277	86.6012	893.726	43.7492	45.0156	855.315	48.4674	50.1797	13.6031		72.9612	4.11241	313.71	0.132543	b.d.	1.09082	b.d.	0.367737	0.551231	0.49526	5.30792	2.24687	31.2533	11.9802	48.171	14.0053	168.399	19.0973	6587.55	0.0654332	35.1809	76.7299	zircon_05Dec13_Devonian_Wetteldorf.csv
12VD-80 M 30 12/5/2013 4:17:58 PM	207.534	2.71607	7408.01	597.228	0.458603	5.4269	0.0613991	3.68653	0.665562	16.2869	3.68653	0.0541719	3.98255		378.194	89.5759	91.1156	383.286	17.3253	18.2354	384.129	13.7474	15.0166	-1.56915		521.85	19.147	2698.69	3.19994	0.660406	59.9922	1.23843	22.2196	27.546	8.12996	109.726	29.8041	338.724	108.194	407.497	94.2656	1023.8	107.401	7168.47	1.28645	563.675	207.534	zircon_05Dec13_Devonian_Wetteldorf.csv
12VD-80 M 31 12/5/2013 4:23:19 PM	173.4	0.389997	19543.8	12834.6	2.06694	4.37955	0.190065	3.05265	0.67648	5.26137	3.05265	0.0788722	3.14035		1168.94	62.1873	63.8957	1137.92	29.9697	32.3054	1121.73	31.4287	35.4794	4.03947		207.452	14.3462	543.21	3.00885	b.d.	6.85369	b.d.	0.633314	2.22193	0.0350697	11.1262	4.39877	55.2424	20.552	86.7238	23.3365	254.212	28.417	8496.5	1.86103	67.6254	173.4	zircon_05Dec13_Devonian_Wetteldorf.csv
12VD-80 M 32 12/5/2013 4:25:01 PM	136.801	0.341314	6077.5	303.249	1.15749	22.6317	0.0873952	15.7432	0.694854	11.4423	15.7432	0.0960572	16.2588		1548.89	305.415	305.732	780.776	123.287	123.669	540.114	81.5664	81.9977	65.1289		641.015	7.48764	1580.91	2.64068	0.550372	7.63989	1.31694	11.8394	10.4164	2.89493	33.1246	12.5483	162.575	59.1957	280.9	73.8527	854.478	92.2867	9016.76	1.28844	46.6921	136.801	zircon_05Dec13_Devonian_Wetteldorf.csv
12VD-80 M 33 12/5/2013 4:26:43 PM	114.186	0.387523	10358.3	17356	1.6442	6.68397	0.163553	5.71492	0.847835	6.11424	5.71492	0.0729112	3.46628		1011.51	70.2704	71.8575	987.325	42.2011	43.6645	976.49	51.7846	53.8087	3.46201		1222.33	7.31383	1110.79	3.81747	45.5416	97.838	14.856	74.6974	25.1226	1.35569	50.8544	13.4266	144.888	44.565	169.429	38.9912	386.451	40.0917	7020.72	1.85082	44.2497	114.186	zircon_05Dec13_Devonian_Wetteldorf.csv
12VD-80 M 34 12/5/2013 4:28:25 PM	151.717	2.69114	10448.3	35.6367	2.22343	46.9769	0.0870021	17.0936	0.36353	11.494	17.0936	0.18535	43.7566		2701.34	722.369	722.472	1188.45	329.018	329.253	537.783	88.1962	88.588	80.092		391.275	26.1055	2406.64	2.87081	0.735827	57.2882	1.67368	19.696	28.6546	8.41623	95.0541	28.7038	305.296	95.5007	357.03	88.0237	917.431	93.1906	5906.35	1.15389	408.29	151.717	zircon_05Dec13_Devonian_Wetteldorf.csv
12VD-80 M 35 12/5/2013 4:30:07 PM	136.267	1.13889	5567.31	225.663	0.716391	21.1336	0.0587932	6.83391	0.321468	17.0088	6.83391	0.0883734	19.9982		1390.62	383.76	384.023	548.534	89.5649	89.8827	368.282	24.4626	25.1412	73.5166		740.346	62.1951	2144.61	3.45539	0.63518	22.2954	0.395664	4.48245	9.69615	2.72635	51.078	19.9018	227.282	83.3056	342.333	85.1755	901.535	95.6105	7235.4	0.977803	155.193	136.267	zircon_05Dec13_Devonian_Wetteldorf.csv
12VD-80 M 36 12/5/2013 4:31:49 PM	282.314	0.356406	11377.1	1403.75	0.496395	6.95616	0.0621561	5.81414	0.829048	16.0885	5.81414	0.0579217	3.8189		526.808	83.7115	85.2703	409.259	23.4305	24.1792	388.725	21.9331	22.7591	26.2112		886.033	10.3055	1959.22	7.06354	b.d.	9.71641	0.0428249	0.797069	2.85758	0.640312	25.2807	13.201	193.102	77.6848	368.418	99.4679	1132.55	118.176	10132.6	3.78505	100.618	282.314	zircon_05Dec13_Devonian_Wetteldorf.csv
12VD-80 S 37 12/5/2013 4:33:34 PM	88.5365	0.405548	5725.14	801.109	1.16833	10.6241	0.124695	9.51512	0.892905	8.01954	9.51512	0.0679538	4.72591		867.166	97.9702	99.1648	785.863	58.1249	58.9358	757.533	68.0061	68.9843	12.6427		336.778	3.58597	1388.87	2.57308	b.d.	4.68314	0.108517	2.20737	5.56176	0.804684	30.1042	11.4911	142.655	52.2199	228.538	53.5934	525.962	67.7946	9878.27	1.24074	35.9058	88.5365	zircon_05Dec13_Devonian_Wetteldorf.csv
12VD-80 S 38 12/5/2013 4:35:16 PM	147.291	1.18254	11792.6	118.315	3.2682	18.3453	0.154113	6.94952	0.376669	6.48873	6.94952	0.153804	16.9781		2388.65	289.035	289.309	1473.52	142.633	143.296	923.979	59.8225	61.4052	61.318		260.648	46.0581	899.418	4.55925	1.47425	10.762	1.63896	13.4975	13.2922	2.54093	27.5736	9.25439	105.565	34.0765	144.673	33.5595	348.182	44.1308	10431.5	1.98614	174.177	147.291	zircon_05Dec13_Devonian_Wetteldorf.csv
12VD-80 S 39 12/5/2013 4:36:57 PM	150.733	2.06161	5382.13	130.2	0.837207	15.9626	0.0604041	4.51207	0.278864	16.5552	4.51207	0.100523	15.3116		1633.79	284.455	284.787	617.603	73.8599	74.3179	378.082	16.5687	17.6036	76.8585		783.419	22.4887	3012.38	1.97193	0.156431	27.0016	0.704372	10.7478	16.34	4.12281	87.8699	26.6204	341.747	117.107	489.852	111.045	1137.87	141.179	9258.51	1.01488	310.753	150.733	zircon_05Dec13_Devonian_Wetteldorf.csv
12VD-80 S 40 12/5/2013 4:38:39 PM	195.208	2.41977	7643.07	143.197	0.975312	23.5788	0.063935	8.1972	0.346235	15.6409	8.1972	0.110638	22.1081		1809.92	401.725	401.95	691.198	118.212	118.547	399.512	31.7546	32.3653	77.9266		568.452	14.8291	2712.91	3.24677	0.709869	51.1414	1.43801	17.2377	20.3643	5.35862	79.3028	25.28	286.188	99.1174	402.717	96.3177	950.301	120.95	9643.86	1.5048	472.358	195.208	zircon_05Dec13_Devonian_Wetteldorf.csv
12VD-80 S 41 12/5/2013 4:47:30 PM	76.9804	4.2643	2788.34	453.214	0.432001	7.92651	0.059758	4.5984	0.572636	16.7342	4.5984	0.0524309	6.45633		304.263	147.132	148.093	364.596	24.2802	24.8863	374.154	16.7153	17.7241	-22.9704		474.81	34.3654	2374.94	1.4672	0.101811	35.3544	0.778444	14.9639	22.5345	6.49357	92.9496	26.4926	289.13	93.0992	353.838	78.5638	750.846	96.2153	8869.47	0.6337	328.267	76.9804	zircon_05Dec13_Devonian_Wetteldorf.csv
12VD-80 S 42 12/5/2013 4:49:11 PM	182.269	3.38517	6932.29	175.565	0.82652	16.8843	0.0651905	3.35163	0.193682	15.3397	3.35163	0.0919535	16.5483		1466.43	314.29	314.604	611.68	77.5785	78.0061	407.114	13.223	14.6767	72.2377		584.072	19.7547	3613.9	2.99729	0.468726	56.4023	1.40432	24.5309	37.4126	12.8786	145.923	42.0309	452.54	140.625	540.591	119.775	1148.89	147.434	9039.45	1.01454	617.011	182.269	zircon_05Dec13_Devonian_Wetteldorf.csv
12VD-80 S 43 12/5/2013 4:50:53 PM	106.469	2.77071	3300.16	281.874	0.658792	12.747	0.0679743	8.33231	0.651101	14.7115	8.33231	0.0702915	9.64663		936.879	197.816	198.395	513.875	51.4035	51.9025	423.94	34.1875	34.8276	54.7498		439.945	16.4519	2130.7	1.80269	0.216532	35.4736	0.796645	9.48916	15.5322	4.07443	64.8267	20.4739	234.91	80.8371	332.477	76.3513	694.306	101.374	9466.25	0.83826	294.996	106.469	zircon_05Dec13_Devonian_Wetteldorf.csv
12VD-80 S 44 12/5/2013 4:52:35 PM	98.092	2.99013	3607.28	586.323	0.489711	6.80161	0.0604351	4.01801	0.580762	16.5467	4.01801	0.0587692	5.48794		558.553	119.651	120.73	404.714	22.7028	23.467	378.271	14.7616	15.9149	32.2766		353.377	23.0696	2016.32	1.6347	0.0765068	33.9284	0.516608	9.56884	15.4321	4.11293	64.0942	20.0139	228.223	79.5473	313.55	72.813	693.302	90.9109	9872.59	0.974927	293.308	98.092	zircon_05Dec13_Devonian_Wetteldorf.csv
12VD-80 S 45 12/5/2013 4:54:17 PM	138.028	2.51377	5069.46	2070.29	0.495814	7.43816	0.0637007	5.93755	0.792081	15.6984	5.93755	0.0564512	4.48015		470.194	99.1629	100.501	408.865	25.0343	25.7388	398.092	22.9219	23.7558	15.3344		520.521	30.2532	2761.74	3.28244	0.106843	45.9762	0.409682	8.36427	15.9743	5.19123	80.5575	25.1688	305.524	104.907	428.003	100.935	945.478	125.712	10534.3	1.41895	346.972	138.028	zircon_05Dec13_Devonian_Wetteldorf.csv
12VD-80 S 46 12/5/2013 4:55:59 PM	42.8864	0.927495	3878.93	630.478	1.51958	8.0331	0.151703	6.19438	0.765629	6.59183	6.19438	0.0726489	5.11472		1004.19	103.804	104.88	938.309	49.1936	50.3846	910.503	52.5981	54.3623	9.32994		327.22	24.7891	900.765	3.47003	0.481162	34.4389	0.290874	2.49419	4.76604	1.26419	25.5354	7.61032	91.8597	33.0348	142.724	34.9256	341.81	47.8259	11202.8	1.27845	39.7769	42.8864	zircon_05Dec13_Devonian_Wetteldorf.csv
12VD-80 S 47 12/5/2013 4:57:41 PM	203.142	0.326026	18401.7	3520.89	1.5761	5.98685	0.160905	5.34208	0.883783	6.21486	5.34208	0.071042	2.70269		958.641	55.2355	57.2588	960.835	37.192	38.7589	961.802	47.731	49.8088	-0.329679		1033.58	11.9726	636.295	3.71847	43.1084	86.6365	8.16708	38.4711	9.17702	1.37681	16.51	5.3064	57.798	21.761	98.9397	26.894	290.914	45.0799	13298.9	1.58916	66.2296	203.142	zircon_05Dec13_Devonian_Wetteldorf.csv
12VD-80 S 48 12/5/2013 4:59:23 PM	72.9987	1.41653	4893.25	387.313	1.73219	12.1178	0.136971	8.58073	0.705489	7.30081	8.58073	0.0917202	8.55644		1461.59	162.615	163.218	1020.57	78.008	78.8413	827.513	66.638	67.8085	43.3827		396.291	38.763	2116.48	2.80021	0.650986	18.1327	0.652888	9.27743	13.3847	2.16684	65.5193	18.939	238.701	76.9741	326.074	76.2626	705.357	100.338	11171.5	1.17419	103.405	72.9987	zircon_05Dec13_Devonian_Wetteldorf.csv
12VD-80 S 49 12/5/2013 5:01:05 PM	17.8677	0.723336	1616.07	149.886	1.40428	11.0807	0.159145	6.46341	0.579505	6.28359	6.46341	0.0639972	9.0003		741.538	190.367	191.006	890.746	65.715	66.558	952.021	57.2051	58.9755	-28.3846		246.856	8.62775	1209.75	1.20429	b.d.	2.79139	0.127791	4.63564	10.1506	2.17094	47.1588	13.3332	153.121	46.5887	175.633	37.0086	336.675	43.0093	9761.64	0.527625	12.9243	17.8677	zircon_05Dec13_Devonian_Wetteldorf.csv
12VD-80 S 50 12/5/2013 5:02:47 PM	115.928	0.711659	9245.48	565.904	1.44965	6.91495	0.148005	5.36108	0.767948	6.75652	5.36108	0.0710372	4.36753		958.484	89.2633	90.5278	909.728	41.5507	42.8881	889.771	44.5557	46.5151	7.16889		2427.09	15.942	1590.09	2.3265	38.539	89.8601	12.2606	69.6811	21.2552	1.73927	51.8674	15.9415	165.604	59.9492	227.777	49.3859	460.244	61.0547	11207.3	1.21518	82.5015	115.928	zircon_05Dec13_Devonian_Wetteldorf.csv
12VD-80 S 51 12/5/2013 5:08:13 PM	95.5539	2.0697	12333.7	883.356	2.55131	6.35936	0.223424	4.47352	0.6939	4.47579	4.47352	0.0828195	4.51986		1264.96	88.275	89.4418	1286.81	46.3894	48.1383	1299.94	52.6648	55.936	-2.76524		211.588	4.69342	2747.9	1.97932	0.235501	11.9196	1.16317	18.2991	24.0496	0.219577	107.635	29.4138	328.521	109.064	415.144	83.7529	726.232	90.3948	11222.2	1.66505	197.768	95.5539	zircon_05Dec13_Devonian_Wetteldorf.csv
12VD-80 S 52 12/5/2013 5:09:55 PM	182.943	0.51214	7904.93	145.577	1.00429	17.738	0.0761641	8.65715	0.486286	13.1295	8.65715	0.0956328	15.482		1540.56	291.145	291.475	705.984	90.2472	90.6948	473.186	39.4971	40.1726	69.2847		1084.77	27.1665	3017.57	3.1099	0.327828	5.92987	0.454398	3.41172	4.2694	1.024	30.0937	14.9178	254.656	107.408	542.453	145.873	1457.18	207.408	11915.7	1.74411	93.6922	182.943	zircon_05Dec13_Devonian_Wetteldorf.csv
12VD-80 S 53 12/5/2013 5:11:37 PM	119.578	1.73518	4898.3	611.965	0.806431	11.1393	0.0681698	4.59365	0.407073	14.6692	4.59365	0.0857973	10.1481		1333.64	196.283	196.8	600.45	50.4935	51.1291	425.12	18.8985	20.0292	68.1233		745.102	17.8645	2473.6	1.77958	0.237924	18.6633	0.616838	6.81365	14.2205	3.19259	62.9361	22.121	262.074	92.4999	387.591	94.7686	931.187	124.588	10328.4	0.737229	207.488	119.578	zircon_05Dec13_Devonian_Wetteldorf.csv
12VD-80 S 54 12/5/2013 5:13:20 PM	115.427	0.373687	10897.9	4450.54	1.46993	9.15063	0.151886	8.12114	0.883842	6.58389	8.12114	0.0701904	4.21676		933.911	86.5103	87.8212	918.099	55.2959	56.3135	911.526	69.0309	70.3616	2.39692		288.422	4.1744	725.481	1.26957	b.d.	5.07875	0.0377862	0.488842	1.85809	0.415964	11.1978	5.18912	68.8755	25.902	122.352	30.4866	312.933	47.899	10976.9	0.632787	43.1336	115.427	zircon_05Dec13_Devonian_Wetteldorf.csv
12VD-80 S 55 12/5/2013 5:15:02 PM	173.669	0.327111	7527.98	940.501	0.512664	6.74136	0.0651567	4.26942	0.623889	15.3476	4.26942	0.0570654	5.21708		494.073	115.002	116.143	420.239	23.1989	23.9837	406.91	16.8358	17.9895	17.6418		999.314	6.10687	2644.34	2.92107	b.d.	4.46671	b.d.	0.237839	2.39969	0.510772	22.4436	12.3742	212.973	95.292	461.244	123.424	1293.44	187.173	13641.2	1.90737	56.8089	173.669	zircon_05Dec13_Devonian_Wetteldorf.csv
12VD-80 S 56 12/5/2013 5:16:44 PM	34.8728	1.01562	3701.06	214.386	2.58496	11.1303	0.185834	9.31152	0.833972	5.38116	9.31152	0.100885	6.09753		1640.46	113.182	114.005	1296.39	81.4906	82.5188	1098.77	94.0674	95.4692	33.0208		2554.16	1176.96	975.022	2.29725	95.4185	162.162	27.2984	119.71	29.6565	3.61571	43.4531	10.0322	106.046	36.5656	148.574	32.992	309.182	46.8332	9090.2	0.894723	35.4174	34.8728	zircon_05Dec13_Devonian_Wetteldorf.csv
12VD-80 S 57 12/5/2013 5:18:26 PM	127.378	0.647854	17271	1601.84	2.83385	3.31343	0.235363	2.50517	0.723399	4.24875	2.50517	0.0873247	2.16862		1367.67	41.7473	44.0887	1364.54	24.8685	28.1339	1362.55	30.768	36.4464	0.374867		677.293	23.318	1376.49	2.79077	18.4599	38.8369	5.75085	30.9495	11.6735	0.534979	38.1612	12.9964	145.253	52.1421	211.882	51.8034	468.274	65.6895	10778.5	1.32582	82.5226	127.378	zircon_05Dec13_Devonian_Wetteldorf.csv
12VD-80 S 58 12/5/2013 5:20:08 PM	268.839	0.474755	18657.5	3569.83	1.06406	6.75694	0.112825	6.04065	0.887351	8.86331	6.04065	0.0684007	3.02767		880.722	62.6319	64.4573	735.822	35.3691	36.5366	689.132	39.4802	40.8217	21.7538		369.883	20.5347	1246.19	3.78322	0.133241	9.33945	0.0459339	1.29607	2.45183	0.277364	18.8672	8.03394	110.874	43.5393	203.298	50.0338	532.863	74.7141	12570	2.50387	127.633	268.839	zircon_05Dec13_Devonian_Wetteldorf.csv
12VD-80 S 59 12/5/2013 5:21:49 PM	515.461	0.215956	53977.9	8773.5	1.74855	3.78698	0.177354	3.72854	0.965379	5.63845	3.72854	0.071505	0.662743		971.899	13.5171	20.2022	1026.63	24.4623	26.8138	1052.5	36.2068	39.1449	-8.29331		127.894	4.66149	510.802	10.9093	b.d.	5.03791	0.0224429	b.d.	0.57083	0.0458825	7.32926	3.03335	44.2847	16.1262	82.0848	21.769	224.245	30.5416	14658	8.45664	111.317	515.461	zircon_05Dec13_Devonian_Wetteldorf.csv
12VD-83 S 60 12/5/2013 5:23:32 PM	215.712	0.612665	9261.77	1772.1	0.56113	4.61672	0.0715591	2.75369	0.575155	13.9745	2.75369	0.0568719	3.70558		486.562	81.7895	83.3871	452.262	16.8496	18.0371	445.542	11.8544	13.7161	8.43067		158.618	9.98613	2509.21	1.95117	0.0427582	4.20378	0.31457	6.751	17.9779	2.76723	86.2362	28.6193	310.627	101.099	398.371	86.9351	885.807	92.8158	6011.48	0.580035	132.159	215.712	zircon_05Dec13_Devonian_Wetteldorf.csv
12VD-83 S 61 12/5/2013 5:32:22 PM	272.611	1.905	12071.8	292.029	1.19992	5.9122	0.0952635	2.59313	0.420975	10.4972	2.59313	0.0913531	5.31317		1453.97	101.08	102.044	800.547	32.7434	34.1593	586.591	14.5395	17.0732	59.6558		408.429	62.5111	2432.59	15.4358	3.72506	12.3304	4.34578	38.8988	37.6043	7.47822	110.187	31.6042	309.324	99.1162	365.992	82.012	818.612	99.3898	9052.34	1.63569	519.323	272.611	zircon_05Dec13_Devonian_Wetteldorf.csv
12VD-83 S 62 12/5/2013 5:34:04 PM	526.613	4.48079	11169.8	103.42	1.14689	15.8374	0.0609415	13.1143	0.826754	16.4092	13.1143	0.136493	8.87922		2183.17	154.502	155.03	775.775	85.9068	86.4346	381.349	48.5606	48.9194	82.5323		605.111	39.5434	3646.72	39.3564	25.1117	95.8694	28.6397	272.556	212.827	40.6305	311.698	77.2253	589.693	121.859	403.153	85.7027	916.098	104.425	11217.5	0.95708	2359.64	526.613	zircon_05Dec13_Devonian_Wetteldorf.csv
12VD-83 S 63 12/5/2013 5:35:46 PM	90.4403	0.359621	4041.48	452.565	0.97707	12.0288	0.100405	8.44324	0.699257	9.9597	8.44324	0.0705782	8.56766		945.221	175.464	176.108	692.101	60.3611	61.0101	616.78	49.6625	50.5559	34.7476		386.178	17.0854	1004.21	1.7333	0.110442	11.4857	0.074537	1.78785	2.98071	0.625694	12.9836	5.63836	85.3744	35.2559	191.178	51.531	598.733	91.3461	12032.3	1.10681	32.5242	90.4403	zircon_05Dec13_Devonian_Wetteldorf.csv
12VD-83 S 64 12/5/2013 5:37:28 PM	555.806	1.61821	18727	2645.69	0.570168	10.8667	0.0680641	7.5082	0.687626	14.692	7.5082	0.0607552	7.85574		630.546	169.22	169.959	458.123	40.0668	40.5809	424.482	30.8443	31.5234	32.6803		373.389	15.6558	4996.21	18.6135	3.9434	33.6979	5.69715	54.202	55.9447	6.77466	176.892	52.787	602.883	196.495	758.467	158.351	1334.08	191.589	9395.58	3.11763	899.408	555.806	zircon_05Dec13_Devonian_Wetteldorf.csv
12VD-83 S 65 12/5/2013 5:39:10 PM	199.078	1.06567	5878.48	658.274	0.610911	13.7053	0.0665022	5.14012	0.371215	15.0371	5.14012	0.0666256	12.7049		826.105	265.097	265.539	484.135	52.7747	53.2106	415.048	20.6617	21.6454	49.7584		448.53	12.7564	2419.07	4.02984	0.588633	19.526	0.68138	7.47062	12.4056	2.68903	62.4514	19.6903	251.294	90.8945	389.329	92.2818	885.069	127.076	9834.07	1.86251	212.151	199.078	zircon_05Dec13_Devonian_Wetteldorf.csv
12VD-83 S 66 12/5/2013 5:40:52 PM	214.373	0.829406	7553.34	395.146	0.850593	13.6436	0.0894858	10.1827	0.744392	11.175	10.1827	0.0689392	9.08083		896.915	187.376	187.988	624.975	63.6753	64.2042	552.495	53.9156	54.5785	38.4004		337.103	7.18325	1633.42	2.04281	0.280749	11.0771	0.308936	4.14755	5.57668	1.57741	27.4022	9.5717	133.705	52.8963	255.949	76.4795	761.927	118.493	10714.1	1.34957	177.802	214.373	zircon_05Dec13_Devonian_Wetteldorf.csv
12VD-83 S 67 12/5/2013 5:42:34 PM	533.608	1.21692	6854.33	326.908	0.929526	14.2233	0.0658449	9.05955	0.634857	15.1872	9.05955	0.102385	10.9648		1667.83	202.814	203.268	667.385	69.5732	70.1055	411.074	36.0789	36.639	75.3527		587.173	1703.79	3070.43	52.8348	6.22419	22.2148	6.53521	53.6372	43.059	9.71453	95.7615	30.0794	341.326	102.018	419.21	93.8176	877.886	122.747	11632.5	13.7602	649.36	533.608	zircon_05Dec13_Devonian_Wetteldorf.csv
12VD-83 S 68 12/5/2013 5:44:16 PM	235.311	0.810978	30961.1	2386.92	3.27376	4.4547	0.263145	3.86801	0.852656	3.80018	3.86801	0.0902298	2.20972		1430.4	42.1734	44.4406	1474.84	34.6486	37.1611	1505.91	51.9455	56.0268	-5.27941		185.343	8.01473	3053.29	4.89917	0.564583	13.0502	0.874332	14.7857	22.6791	3.2986	106.113	29.4659	352.019	116.84	466.116	98.0641	845.727	123.908	10738.3	1.70653	190.832	235.311	zircon_05Dec13_Devonian_Wetteldorf.csv
12VD-83 S 69 12/5/2013 5:45:58 PM	124.078	0.783197	13087	1235.39	1.83922	5.85822	0.181368	5.11565	0.864253	5.51364	5.11565	0.073548	2.85461		1029.11	57.7164	59.5942	1059.58	38.5328	40.2203	1074.45	50.6286	53.0221	-4.40563		238.522	11.4098	999.589	7.0875	0.0530545	50.7896	0.0690907	2.55782	5.54431	0.69753	24.6173	8.47406	101.377	37.2036	154.753	37.2206	374.956	52.6218	12694.2	3.09822	97.1772	124.078	zircon_05Dec13_Devonian_Wetteldorf.csv
12VD-83 S 70 12/5/2013 5:47:40 PM	748.929	2.22834	14143.3	91.114	2.03367	7.40161	0.0709859	6.56638	0.881614	14.0873	6.56638	0.207782	3.41562		2888.32	55.4385	56.7039	1126.84	50.3812	51.7713	442.092	28.0564	28.8667	84.6938		1006.3	46.9557	6709.26	33.287	38.1373	85.4376	33.702	260.015	213.443	37.8595	375.791	101.703	965.168	265.76	966.174	204.085	1936.06	217.66	10292.9	3.26652	1668.87	748.929	zircon_05Dec13_Devonian_Wetteldorf.csv
12VD-83 S 71 12/5/2013 5:56:31 PM	122.984	0.691491	5540.62	501.59	0.598272	6.359	0.0760055	4.58665	0.712069	13.1569	4.58665	0.057089	4.40449		494.977	97.0747	98.4106	476.136	24.1694	25.0797	472.236	20.8854	22.1223	4.5945		518.953	6.18171	4380.29	3.79105	2.59566	19.8606	1.25694	12.9806	16.5475	3.05691	100.972	36.7444	472.907	167.791	694.701	160.498	1507.16	194.638	8007.42	1.52567	85.0423	122.984	zircon_05Dec13_Devonian_Wetteldorf.csv
12VD-83 S 72 12/5/2013 5:58:14 PM	631.832	0.767161	20924.8	270.177	1.01289	9.55507	0.0707147	7.93722	0.827139	14.1413	7.93722	0.103885	5.31977		1694.64	98.0653	98.992	710.335	48.821	49.6224	440.46	33.7927	34.4526	74.0086		1013.3	10.9168	2757.45	13.7076	66.8674	158.053	27.7782	172.729	76.291	6.93287	120.528	36.9408	360.724	111.165	436.969	98.6044	929.512	109.921	10039.3	4.66765	484.717	631.832	zircon_05Dec13_Devonian_Wetteldorf.csv
12VD-83 S 73 12/5/2013 5:59:56 PM	425.733	1.20378	14052.2	23545.4	0.483291	6.59147	0.0644706	4.68177	0.701574	15.5109	4.68177	0.0543683	4.63988		386.327	104.212	105.504	400.328	21.8069	22.5607	402.756	18.2792	19.3007	-4.25284		271.831	7.55017	3200.59	8.11557	1.18648	29.7674	1.90368	25.2674	30.6138	2.93288	122.465	36.7186	410.625	130.845	500.546	111.307	1061.6	128.734	8413.48	1.70257	512.49	425.733	zircon_05Dec13_Devonian_Wetteldorf.csv
12VD-83 S 74 12/5/2013 6:01:38 PM	379.494	1.38571	12867	1305.49	0.512805	9.81772	0.0563627	3.06846	0.303631	17.7422	3.06846	0.0659871	9.32589		805.939	195.221	195.823	420.334	33.7917	34.324	353.467	10.554	11.8844	56.1422		403.433	25.2233	4074.59	31.5063	17.2374	63.5691	6.57249	51.8209	59.9014	4.11803	197.449	59.1535	586.064	171.322	620.744	131.749	1224.76	136.537	6616.59	3.34148	525.866	379.494	zircon_05Dec13_Devonian_Wetteldorf.csv
12VD-83 S 75 12/5/2013 6:03:20 PM	130.811	0.59145	11637.9	979.605	1.64833	7.20173	0.169597	6.31184	0.87053	5.89633	6.31184	0.0704894	3.46779		942.672	71.0467	72.6149	988.91	45.5133	46.839	1009.89	59.0006	60.8442	-7.13063		358.595	7.70117	2146.58	4.78306	b.d.	5.91342	0.519571	7.87994	13.5282	1.26044	75.8124	25.7998	278.145	83.6943	288.25	61.6415	575.81	62.9815	8558.22	2.13678	77.368	130.811	zircon_05Dec13_Devonian_Wetteldorf.csv
12VD-83 S 76 12/5/2013 6:05:02 PM	121.968	0.343947	5752.85	2349.38	0.888407	12.1645	0.0872734	5.91549	0.482564	11.4582	5.91549	0.0738293	10.6293		1036.8	214.661	215.17	645.513	58.1085	58.7131	539.392	30.6092	31.7084	47.9756		699.56	11.5073	1683.94	2.32203	1.03697	5.71941	0.585458	5.48847	5.04548	0.887823	21.0753	10.0529	153.55	60.9086	292.357	77.2787	815.705	119.245	9392.84	1.13005	41.9505	121.968	zircon_05Dec13_Devonian_Wetteldorf.csv
12VD-83 S 77 12/5/2013 6:06:44 PM	29.7692	0.617173	2531.64	192.662	1.63226	7.56539	0.157076	3.9063	0.507265	6.36636	3.9063	0.0753665	6.47888		1078.29	130.03	130.858	982.729	47.6345	48.9118	940.504	34.1846	36.9559	12.7781		218.941	19.61	627.032	1.48676	b.d.	5.26087	0.0543908	1.07161	3.02586	0.396546	16.9127	5.55542	68.5425	23.1868	100.177	24.967	259.782	29.1939	9273.35	0.571692	18.3728	29.7692	zircon_05Dec13_Devonian_Wetteldorf.csv
12VD-83 S 78 12/5/2013 6:08:26 PM	274.527	0.784722	31216.4	1176.97	2.46251	3.98457	0.211631	2.96059	0.720292	4.7252	2.96059	0.0843913	2.66678		1301.6	51.8134	53.7308	1261.1	28.7739	31.3434	1237.5	33.3354	37.6674	4.92435		9278.7	7.56912	2296.49	3.99846	1031.13	2301.6	320.488	1613.24	379.54	5.75142	354.381	54.3928	396.315	90.3094	293.953	62.2649	592.3	63.3442	9383.31	2.27147	215.427	274.527	zircon_05Dec13_Devonian_Wetteldorf.csv
Notes: b.d. – below detection
†error corr. – error correlation
§sys – systematic

## Sheet: Table S3
TABLE S3. ZIRCON U-Pb ISOTOPE RATIOS AND TRACE ELEMENT CONCENTRATIONS BY LA-ICPMS: STANDARD DATA
Analysis	Isotopic Data														Dates											Concentrations																						Experiment
	U	Th/U	206Pb	206Pb/204Pb	207Pb/235U	±2σ	206Pb/238U	±2σ	error corr.†	238U/206Pb	±2σ	207Pb/206Pb	±2σ		207Pb/206Pb	±2σ	±2σ,sys§	207Pb/235U	±2σ	±2σ,sys§	206Pb/238U	±2σ	±2σ,sys§	discordance		P	Ti	Y	Nb	La	Ce	Pr	Nd	Sm	Eu	Gd	Tb	Dy	Ho	Er	Tm	Yb	Lu	Hf	Ta	Th	U
	(ppm)		(cps)			(%)		(%)			(%)		(%)		(Ma)	(Ma)	(Ma)	(Ma)	(Ma)	(Ma)	(Ma)	(Ma)	(Ma)	(%)		(ppm)	(ppm)	(ppm)	(ppm)	(ppm)	(ppm)	(ppm)	(ppm)	(ppm)	(ppm)	(ppm)	(ppm)	(ppm)	(ppm)	(ppm)	(ppm)	(ppm)	(ppm)	(ppm)	(ppm)	(ppm)	(ppm)
PL 79 12/5/2013 3:07:38 PM	339.904	0.0993623	11094.2	1803.24	0.401057	4.66161	0.053206	3.13677	0.653775	18.7949	3.13677	0.0546694	3.44838		398.7	77.283	79.079	342.415	13.5493	14.5173	334.175	10.2152	11.5121	16.184		182.762	54.1684	255.638	2.27194	0.00845984	1.30079	b.d.	0.878038	1.27162	0.471913	7.15938	2.74876	28.3527	8.5895	26.4185	5.85342	46.1816	4.10322	10998.4	1.87072	33.7736	339.904	zircon_05Dec13_Devonian_Wetteldorf.csv
PL 80 12/5/2013 3:09:20 PM	330.853	0.099036	10984.9	835.966	0.380595	4.49718	0.0530203	3.90245	0.851832	18.8607	3.90245	0.0520619	2.23506		288.088	51.0835	53.8653	327.476	12.5883	13.552	333.038	12.6666	13.7269	-15.6027		180.242	49.0186	242.347	2.46697	b.d.	0.880978	0.045415	0.558899	1.2341	0.297587	5.95187	2.60833	28.7464	7.89881	26.3559	5.10157	42.8822	3.59214	11242.8	2.03686	32.7663	330.853	zircon_05Dec13_Devonian_Wetteldorf.csv
PL 81 12/5/2013 3:11:02 PM	329.318	0.100817	10817.4	18125.3	0.389465	5.6664	0.053369	4.47887	0.779419	18.7375	4.47887	0.0529271	3.47099		325.69	78.7981	80.6043	333.979	16.1272	16.9152	335.173	14.6283	15.5666	-2.91147		188.518	49.904	242.376	2.35869	b.d.	0.970863	0.0558097	0.566062	1.4999	0.423166	6.8571	2.48543	28.1403	7.76167	24.4602	5.46252	40.992	3.94514	11170.1	1.83711	33.2008	329.318	zircon_05Dec13_Devonian_Wetteldorf.csv
PL 82 12/5/2013 3:12:44 PM	331.765	0.103128	10810.4	2425.91	0.402461	4.62202	0.0541853	2.97923	0.624296	18.4552	2.97923	0.0538693	3.53373		365.561	79.6589	81.4207	343.432	13.4677	14.4451	340.166	9.87158	11.2514	6.947		188.736	50.7693	254.904	2.42003	b.d.	1.38751	0.0232709	0.34829	1.97585	0.322755	7.45066	2.6998	29.2954	7.85943	27.6357	5.83381	42.9992	3.6042	11623.8	2.17006	34.2143	331.765	zircon_05Dec13_Devonian_Wetteldorf.csv
PL 83 12/5/2013 3:35:05 PM	346.341	0.100571	11127.9	3297.57	0.385772	6.17711	0.0535797	3.2708	0.515756	18.6638	3.2708	0.0522191	5.24009		295.03	119.613	120.817	331.276	17.4604	18.1761	336.461	10.7227	11.9713	-14.043		193.206	52.4329	266.984	2.68501	b.d.	1.37065	0.0729982	0.5989	1.33515	0.521255	7.24572	2.82225	28.1968	9.31029	31.9215	5.58814	46.8951	4.23293	11607.5	1.72047	34.832	346.341	zircon_05Dec13_Devonian_Wetteldorf.csv
PL 84 12/5/2013 3:36:47 PM	327.081	0.100295	10481.7	772.998	0.383071	6.26526	0.0523597	4.52136	0.711853	19.0987	4.52136	0.0530617	4.33715		331.425	98.3623	99.8035	329.295	17.6199	18.3228	328.992	14.5017	15.4093	0.733988		188.098	51.0396	246.679	2.68953	0.0268421	1.22694	b.d.	0.867465	0.926847	0.412898	5.69149	2.54722	31.1061	7.44099	25.9315	4.8716	40.8107	4.01772	11388.5	1.95127	32.8046	327.081	zircon_05Dec13_Devonian_Wetteldorf.csv
PL 85 12/5/2013 3:55:44 PM	328.538	0.0983078	10656.4	900.855	0.394183	3.94578	0.0537828	3.32775	0.822319	18.5933	3.32775	0.0531562	2.12019		335.451	48.0497	50.9187	337.421	11.3277	12.4298	337.704	10.9487	12.1769	-0.671809		207.866	48.4254	227.446	2.80983	b.d.	1.14871	0.0126111	0.874055	1.2705	0.348446	6.2334	2.46388	26.534	7.53809	24.9588	4.62817	41.5607	3.63966	11299.5	1.6778	32.2979	328.538	zircon_05Dec13_Devonian_Wetteldorf.csv
PL 86 12/5/2013 3:57:26 PM	342.156	0.101415	10992	4488.96	0.399055	6.22598	0.0542104	4.66123	0.739154	18.4466	4.66123	0.0533887	4.12743		345.324	93.3759	94.8783	340.963	18.0317	18.7553	340.32	15.4516	16.3571	1.4491		229.563	51.762	240.868	2.52321	b.d.	1.12925	b.d.	0.792227	1.73533	0.433948	7.42699	2.6088	29.4057	7.77459	26.7632	5.45432	44.5698	4.1848	11304.7	1.92709	34.6998	342.156	zircon_05Dec13_Devonian_Wetteldorf.csv
PL 87 12/5/2013 4:19:47 PM	383.668	0.105802	12364.7	2009.74	0.402633	5.24015	0.0532455	3.9397	0.738515	18.7809	3.9397	0.0548435	3.45513		405.848	77.3366	79.0973	343.556	15.2735	16.125	334.416	12.8391	13.8718	17.6007		232.671	61.1631	328.02	3.49278	b.d.	1.27659	0.100278	1.29448	2.213	0.721121	8.66124	3.81034	40.25	11.3522	36.9139	7.50398	60.8289	5.52423	10938.1	2.42548	40.5927	383.668	zircon_05Dec13_Devonian_Wetteldorf.csv
PL 88 12/5/2013 4:21:29 PM	326.125	0.0988165	10505.5	2442.85	0.400024	4.51208	0.0536658	3.68801	0.800852	18.6338	3.68801	0.0540614	2.59951		373.587	58.5163	60.8491	341.666	13.0905	14.0685	336.988	12.1089	13.2182	9.79663		200.961	49.1579	225.241	2.48551	b.d.	1.29218	b.d.	0.575689	0.866712	0.25503	5.93508	2.44151	26.0915	6.50807	23.1845	4.83587	37.2313	3.40728	11227.5	1.55372	32.2266	326.125	zircon_05Dec13_Devonian_Wetteldorf.csv
PL 89 12/5/2013 4:40:32 PM	325.01	0.0986103	10463.4	2433.05	0.388027	4.612	0.0541391	3.16914	0.668436	18.4709	3.16914	0.0519816	3.35068		284.645	76.6261	78.4709	332.927	13.0913	14.0243	339.884	10.4924	11.769	-19.406		197.597	47.3883	224.096	2.20325	b.d.	1.2108	0.0245393	0.305043	1.73119	0.200996	6.09315	2.69343	27.9045	6.8955	25.1847	5.02443	43.705	3.33714	11275.2	2.00104	32.0493	325.01	zircon_05Dec13_Devonian_Wetteldorf.csv
PL 90 12/5/2013 4:42:13 PM	375.204	0.107644	11825.2	1922.06	0.382237	5.32804	0.0534081	4.3765	0.809683	18.7238	4.3765	0.0519069	3.03879		281.293	69.5371	71.5666	328.683	14.9605	15.764	335.411	14.3039	15.2384	-19.2393		236.866	60.5008	318.638	2.82928	b.d.	1.32226	0.121102	1.16075	2.05043	0.578487	7.7006	3.31537	37.1401	10.717	35.8274	7.1149	57.5803	4.90874	11539.3	2.48067	40.3886	375.204	zircon_05Dec13_Devonian_Wetteldorf.csv
PL 91 12/5/2013 5:04:39 PM	568.445	0.111887	18494.6	1715.32	0.399535	5.98531	0.0535864	5.35394	0.886024	18.6615	5.35394	0.0540753	2.67569		374.201	60.2236	62.47	341.311	17.3495	18.0794	336.502	17.554	18.3133	10.0744		343.144	82.2459	501.216	4.39778	0.00839037	1.66601	0.160254	1.15955	3.7142	0.810064	14.055	5.41936	61.339	15.6884	55.5558	9.86221	82.9741	7.84318	10622.1	3.82157	63.6015	568.445	zircon_05Dec13_Devonian_Wetteldorf.csv
PL 92 12/5/2013 5:06:21 PM	569.092	0.112594	18381.8	12071.5	0.391302	4.92927	0.0540354	3.77826	0.751895	18.5064	3.77826	0.0525209	3.16582		308.149	72.0961	74.0263	335.32	14.0768	14.9415	339.249	12.4863	13.5488	-10.0927		347.239	79.2805	517.197	4.63564	0.0773343	1.64327	0.0942666	2.34008	3.7097	1.066	15.554	5.93448	63.9451	17.181	52.2965	10.8482	82.2694	7.07774	10831	3.18095	64.0763	569.092	zircon_05Dec13_Devonian_Wetteldorf.csv
PL 93 12/5/2013 5:25:24 PM	560.885	0.109907	18672.4	5533.24	0.394162	5.32056	0.0540193	3.81052	0.702833	18.5119	3.81052	0.0529205	3.71327		325.384	84.3036	85.9429	337.405	15.2739	16.0781	339.151	12.5893	13.6374	-4.23101		360.231	77.8361	483.76	4.45004	b.d.	1.67601	0.133167	1.71904	3.90249	1.06287	15.5723	4.99415	57.9165	16.0181	51.8061	10.2697	84.5007	7.36143	10657.4	3.35958	61.6451	560.885	zircon_05Dec13_Devonian_Wetteldorf.csv
PL 94 12/5/2013 5:27:06 PM	563.761	0.109157	18116.5	3466.31	0.390964	4.67892	0.0521268	4.07262	0.856216	19.184	4.07262	0.0543969	2.3035		387.529	51.725	54.2991	335.073	13.3535	14.2566	327.566	13.0072	13.9604	15.4731		333.212	80.0717	476.08	3.99074	b.d.	1.58794	0.0429337	1.76121	4.25724	0.699261	14.116	5.86613	57.1293	15.9805	56.9888	10.0788	83.095	7.02867	10615.2	2.96912	61.5384	563.761	zircon_05Dec13_Devonian_Wetteldorf.csv
PL 95 12/5/2013 5:49:33 PM	571.231	0.11152	18289	7468.96	0.388676	5.00095	0.0537897	3.97029	0.780348	18.5909	3.97029	0.0524068	3.04077		303.189	69.3097	71.2992	333.402	14.2125	15.0521	337.746	13.0643	14.0636	-11.398		345.849	78.484	491.96	4.478	0.0401035	1.68019	0.113242	2.67794	4.26609	0.952659	14.6243	5.9102	62.5849	16.5185	53.9919	10.9226	82.6008	7.51053	10894.8	2.84847	63.7037	571.231	zircon_05Dec13_Devonian_Wetteldorf.csv
PL 96 12/5/2013 5:51:15 PM	564.201	0.111674	18365.9	2594.68	0.405995	5.1907	0.0550838	4.21118	0.798982	18.1542	4.21118	0.0534559	3.03468		348.198	68.6187	70.5954	345.987	15.2192	16.055	345.658	14.1729	15.1398	0.729646		362.017	81.481	506.397	4.16834	b.d.	2.01528	0.164097	1.53298	3.22701	0.882899	16.1131	5.67143	62.8076	16.5744	55.0214	10.541	85.7487	7.1288	10880.1	3.55478	63.0064	564.201	zircon_05Dec13_Devonian_Wetteldorf.csv
PL 97 12/5/2013 6:10:18 PM	578.17	0.110502	17670	4108.82	0.389696	4.60869	0.0534189	3.43238	0.727823	18.72	3.43238	0.0529091	3.07552		324.916	69.8296	71.7805	334.147	13.1224	14.0268	335.478	11.2204	12.3505	-3.25066		378.313	80.0559	490.087	4.55448	b.d.	1.50007	0.120982	1.65867	4.53684	1.09928	13.3432	6.03589	58.6688	17.3407	53.7166	10.415	87.1217	6.55975	10755.5	3.50178	63.8886	578.17	zircon_05Dec13_Devonian_Wetteldorf.csv
PL 98 12/5/2013 6:12:00 PM	569.748	0.108914	18551.1	5497.29	0.401533	4.69122	0.0540417	3.9788	0.833787	18.5042	3.9788	0.0538879	2.48531		366.335	56.0174	58.3959	342.759	13.6469	14.554	339.288	13.1505	14.1458	7.38321		343.028	79.3026	487.707	4.14941	0.0262762	1.45089	0.121665	1.93965	4.05919	1.10837	10.9457	5.36986	62.503	16.7207	50.0711	10.5316	87.3837	7.1745	10549	3.53419	62.0535	569.748	zircon_05Dec13_Devonian_Wetteldorf.csv
Temora 102 12/5/2013 3:14:27 PM	64.7233	0.373329	2584.54	494.511	0.499315	7.10449	0.0641395	5.46067	0.761428	15.591	5.46067	0.0564609	4.54476		470.543	100.588	101.939	411.239	24.024	24.787	400.751	21.2174	22.1568	14.8322		134.702	9.45685	566.075	0.390411	b.d.	1.86842	0.0576039	0.799711	1.99579	0.411572	11.4554	4.19177	51.3817	18.9417	87.7841	23.7214	269.526	36.7168	7349.92	0.26489	24.163	64.7233	zircon_05Dec13_Devonian_Wetteldorf.csv
Temora 103 12/5/2013 3:16:09 PM	40.8525	0.450866	1662.88	175.225	0.514695	10.5208	0.0641183	4.81235	0.451902	15.5962	4.81235	0.0582192	9.35568		538.012	204.69	205.342	421.601	36.2998	36.8306	400.622	18.6925	19.7533	25.5366		123.864	11.5214	582.646	0.0988311	b.d.	1.6411	0.0658446	0.713984	2.5646	0.567527	14.4802	4.46511	58.8536	20.6994	91.4577	23.7089	247.353	31.0438	8036.18	0.159574	18.419	40.8525	zircon_05Dec13_Devonian_Wetteldorf.csv
Temora 104 12/5/2013 3:59:10 PM	60.5507	0.417055	2513.05	138.16	0.535249	9.07495	0.069403	5.30306	0.578623	14.4086	5.30306	0.055934	7.36426		449.749	163.58	164.411	435.287	32.1256	32.7474	432.558	22.1861	23.214	3.82233		144.34	9.81739	668.79	0.267933	b.d.	1.85317	0.0155007	0.757487	2.95693	0.426594	14.4165	5.00925	61.9515	22.9866	97.455	26.8796	288.523	38.7289	7461.9	0.204126	25.253	60.5507	zircon_05Dec13_Devonian_Wetteldorf.csv
Temora 105 12/5/2013 4:00:52 PM	64.3323	0.591686	2500.35	581.407	0.507691	6.65913	0.0643726	5.60247	0.833922	15.5346	5.60247	0.0572002	3.59949		499.247	79.2752	80.9468	416.896	22.7685	23.58	402.163	21.8427	22.751	19.4461		123.211	11.867	1046.35	0.112583	b.d.	2.10067	0.120341	2.3485	5.3121	1.05358	24.6914	9.00224	107.543	37.92	161.666	39.5082	399.439	48.8913	7797.93	0.221588	38.0646	64.3323	zircon_05Dec13_Devonian_Wetteldorf.csv
Temora 106 12/5/2013 4:43:57 PM	74.5586	0.523425	3011.51	240.456	0.487056	9.21323	0.0689162	5.64776	0.607753	14.5104	5.64776	0.0512574	7.27917		252.452	167.435	168.297	402.902	30.6403	31.2085	429.623	23.4732	24.422	-70.18		133.709	11.7075	1005.65	0.203335	b.d.	2.42193	0.0816081	2.94597	6.94283	0.99545	24.9689	7.96634	95.4535	36.78	157	37.1074	397.003	50.7026	7624.15	0.296512	39.0258	74.5586	zircon_05Dec13_Devonian_Wetteldorf.csv
Temora 107 12/5/2013 4:45:39 PM	58.4027	0.605457	2341.92	263.013	0.483764	9.04653	0.0656163	6.48837	0.712568	15.2401	6.48837	0.0534713	6.30402		348.829	142.529	143.505	400.652	29.9489	30.5251	409.691	25.7552	26.5484	-17.4476		122.303	11.386	1049.94	0.193715	b.d.	2.22829	0.141673	2.45695	6.56907	1.06101	27.1262	9.70255	115.264	39.4221	164.867	40.6289	393.057	46.2948	7882.57	0.12241	35.3603	58.4027	zircon_05Dec13_Devonian_Wetteldorf.csv
Temora 108 12/5/2013 5:28:50 PM	55.9993	0.344342	2279.88	530.142	0.487441	8.07922	0.0670081	5.4791	0.672061	14.9236	5.4791	0.0527586	5.93745		318.456	134.964	135.996	403.165	26.8832	27.523	418.105	22.1813	23.1228	-31.2914		149.164	12.2901	611.561	0.354759	b.d.	1.75125	0.0159265	0.752287	1.88262	0.331143	14.0324	4.73501	57.2068	22.4265	102.842	27.2776	295.502	39.7877	7362.66	0.282101	19.2829	55.9993	zircon_05Dec13_Devonian_Wetteldorf.csv
Temora 109 12/5/2013 5:30:31 PM	42.2942	0.435785	1706.99	191.149	0.492741	11.202	0.0669696	4.96268	0.438153	14.9321	4.96268	0.0533629	10.0428		344.284	227.237	227.845	406.777	37.5457	38.0133	417.873	20.0799	21.1149	-21.3743		148.435	9.88128	505.701	0.16038	b.d.	1.59815	0.0442628	0.720289	1.62377	0.235477	9.37724	4.1174	49.1839	18.0689	82.0684	21.6978	222.808	30.7831	7628.12	0.291574	18.4312	42.2942	zircon_05Dec13_Devonian_Wetteldorf.csv
Temora 110 12/5/2013 6:13:44 PM	57.7166	0.331781	2277.85	3816.67	0.523486	7.16471	0.0643222	4.68927	0.646527	15.5467	4.68927	0.0590259	5.41699		568.067	117.913	118.984	427.477	24.9974	25.7426	401.858	18.2689	19.3073	29.2588		163.24	11.7135	611.152	0.389465	b.d.	2.13357	0.0687768	0.494317	2.05583	0.570845	13.7434	4.20739	55.2019	22.0608	100.776	26.1458	286.571	41.3485	7147.66	0.214067	19.1493	57.7166	zircon_05Dec13_Devonian_Wetteldorf.csv
Temora 111 12/5/2013 6:15:26 PM	52.5873	0.353824	2182.63	374.941	0.484804	10.0253	0.0703567	3.62218	0.353933	14.2133	3.62218	0.0499758	9.3481		193.846	217.333	217.998	401.364	33.2373	33.7469	438.304	15.3485	16.7847	-126.11		152.319	11.9829	558.053	0.372825	b.d.	2.03333	0.0667756	0.826928	1.95399	0.447073	13.0361	4.15769	54.747	20.5549	95.9483	23.5457	265.966	35.7941	7313.92	0.294279	18.6066	52.5873	zircon_05Dec13_Devonian_Wetteldorf.csv
Temora 112 12/5/2013 5:52:58 PM	42.8745	0.423224	1764.39	298.665	0.524638	10.7875	0.0691265	4.62267	0.423128	14.4662	4.62267	0.0550445	9.74682		413.993	217.857	218.473	428.245	37.6914	38.1943	430.891	19.2676	20.401	-4.08168		135.366	9.49998	513.807	0.0696418	b.d.	1.77735	0.0690208	0.941875	1.47772	0.286435	9.84546	4.02785	51.8105	17.5574	81.7127	21.465	228.801	30.2152	7658.16	0.230139	18.1455	42.8745	zircon_05Dec13_Devonian_Wetteldorf.csv
Temora 113 12/5/2013 5:54:40 PM	43.0107	0.411437	1775.43	179.577	0.521051	7.85438	0.0691477	5.5131	0.695705	14.4618	5.5131	0.0546513	5.59437		398.024	125.389	126.462	425.853	27.3198	28.0032	431.019	22.9855	23.9437	-8.28979		127.83	9.89029	450.706	0.235082	b.d.	1.82573	b.d.	0.514851	1.38484	0.450086	8.58548	3.22475	42.9966	15.9445	74.0709	19.4098	210.377	29.2015	7880.24	0.225966	17.6962	43.0107	zircon_05Dec13_Devonian_Wetteldorf.csv
Notes: b.d. – below detection
†error corr. – error correlation
§sys – systematic

## Sheet: Table S4
TABLE S4: R INPUT DATA FOR ASTROCHRONOLGY DURATION ANCHORING
DF.ast.anchors.csv				DF.ast.dur.csv				DF.ast.csv
anchor	age	age.uncertainty		stage	duration	dur.uncertainty		ID	K.age	K.age.uncertainty	B12.age	B12.age.uncertainty	B20.age	B20.age.uncertainty
D27	358.89	0.2		Famennian	13.82	0.16		A-baseFamennian-D27
D15	390.14	0.14		Frasnian	6.7	0.5		A-baseFrasnian-D27
D14	390.82	0.18		Givetian	4.91	0.35		A-baseGivetian-D27
D13	394.29	0.097		EifelianCombined	5.5	0.39		A-baseEifelian-D27
D6	417.61	0.12		Pragian	1.7	0.7		A-baseCarboniferous-D15
D5	417.68	0.21		Lochkovian	7.7	2.8		A-baseFamennian-D15
				EifelianPas.above.A-D14	2.96029	0.473647		A-baseFrasnian-D15
				EifelianPas.below.A-D14	2.03971	0.326476		A-baseGivetian-D15
				EifelianPas.above.A-D15	1.35367	0.216587		A-D15
				EifelianPas.below.A-D15	3.64556	0.58329		A-baseEifelian-D15
				Lochkovian.above.D5D6.K	4.37843	1.59216		A-baseCarboniferous-D14
				Lochkovian.below.D5D6.K	3.32716	1.20988		A-baseFamennian-D14
				Lochkovian.above.D5D6.B12	3.13207	1.13893		A-baseFrasnian-D14
				Lochkovian.below.D5D6.B12	4.56387	1.65959		A-baseGivetian-D14
				Lochkovian.above.D5D6.B20	5.33709	1.94076		A-D14
				Lochkovian.below.D5D6.B20	2.36291	0.85924		A-baseEifelian-D14
								A-baseCarboniferous-D13
								A-baseFamennian-D13
								A-baseFrasnian-D13
								A-baseGivetian-D13
								A-baseEmsian-D6
								A-basePragian-D6
								A-baseLochkovian-D6
								A-baseEmsian-D5
								A-basePragian-D5
								A-baseLochkovian-D5
Notes: The three tables above or the corresponding .csv files available on GitHub (https://github.com/cohgeo/DevonianAgeDepthModel) are used as input into R script "Astrochonology.R" (available as additional supplementary material or on GitHub) which anchors floating astrochronology durations on radioisotopic ages.

## Sheet: Table S5
TABLE S5: RESULTS FROM ASTROCHRONOLGY DURATION ANCHORING
DF.ast.complete.csv
ID	K.age	K.age.uncertainty	B12.age	B12.age.uncertainty	B20.age	B20.age.uncertainty
A-baseFamennian-D27	372.709	0.271837	372.709	0.271837	372.709	0.271837
A-baseFrasnian-D27	379.409	0.638513	379.409	0.638513	379.409	0.638513
A-baseGivetian-D27	384.32	0.755445	384.32	0.755445	384.32	0.755445
A-baseEifelian-D27	389.817	0.880359	389.817	0.880359	389.817	0.880359
A-baseCarboniferous-D15	363.356	0.784668	363.356	0.784668	363.356	0.784668
A-baseFamennian-D15	377.175	0.762878	377.175	0.762878	377.175	0.762878
A-baseFrasnian-D15	383.877	0.496148	383.877	0.496148	383.877	0.496148
A-baseGivetian-D15	388.786	0.286391	388.786	0.286391	388.786	0.286391
A-D15	390.14	0.14	390.14	0.14	390.14	0.14
A-baseEifelian-D15	393.787	0.688329	393.787	0.688329	393.787	0.688329
A-baseCarboniferous-D14	362.429	0.923509	362.429	0.923509	362.429	0.923509
A-baseFamennian-D14	376.249	0.907202	376.249	0.907202	376.249	0.907202
A-baseFrasnian-D14	382.95	0.700641	382.95	0.700641	382.95	0.700641
A-baseGivetian-D14	387.861	0.574512	387.861	0.574512	387.861	0.574512
A-D14	390.82	0.18	390.82	0.18	390.82	0.18
A-baseEifelian-D14	392.86	0.418161	392.86	0.418161	392.86	0.418161
A-baseCarboniferous-D13	363.362	0.858629	363.362	0.858629	363.362	0.858629
A-baseFamennian-D13	377.181	0.839364	377.181	0.839364	377.181	0.839364
A-baseFrasnian-D13	383.88	0.610347	383.88	0.610347	383.88	0.610347
A-baseGivetian-D13	388.79	0.460339	388.79	0.460339	388.79	0.460339
A-baseEmsian-D6	411.53	2.01536	412.778	1.54245	410.575	2.38769
A-basePragian-D6	413.228	1.84231	414.478	1.31936	412.266	2.2458
A-baseLochkovian-D6	420.94	1.40009	422.176	1.92029	419.975	0.999923
A-baseEmsian-D5	411.599	2.01803	412.85	1.56214	410.641	2.39103
A-basePragian-D5	413.298	1.84787	414.547	1.33356	412.336	2.25032
A-baseLochkovian-D5	421.011	1.41429	422.242	1.93127	420.045	1.01507

## Sheet: Table S6
TABLE S6: R INPUT DATA FOR AGE-DEPTH MODELING OF KAUFMANN SCALE
DevonianData_Kaufmann.csv							DevonianPositions_Kaufmann.csv			DevonianPositions_Kaufmann_alt conodont.csv			DevonianPositions_Kaufmann_std conodont.csv
ids	age	uncertainty_2sig	midpoint	halfwidth	distTypes		predictPositions	ids		predictPositions	ids		predictPositions	ids
Cb2	358.43	0.06	101.32	0.78	G		100	baseCarboniferous		102.1	baseNextZone		102.1	baseNextZone
Cb1	358.71	0.06	100.27	0.27	G		73.17	baseFamennian		100.5	lower duplicata		100.5	lower duplicata
D27	358.89	0.2	98.97	1.02	G		59.76	baseFrasnian		100	baseCb		100	baseCb
D26	358.97	0.11	98.97	1.02	G		52.42	baseGivetian		100	sulcata		100	sulcata
D25	359.25	0.06	98.97	1.02	G		45.75	baseEifelian		99.8	upper praesulcata		99.8	upper praesulcata
D23	362.87	0.53	95.73	0.68	G		15.73	baseEmsian		98	middle praesulcata		98	middle praesulcata
D22	364.08	2.05	95.73	0.68	G		10.16	basePragian		96.4	lower praesulcata		96.4	lower praesulcata
D19	372.36	0.05	71.4	1.03	G		0	baseLochkovian		95	upper expansa		95	upper expansa
D18	375.14	0.12	63.81	0.37	G					94.6	middle expansa		94.6	middle expansa
D17	375.25	0.13	64.62	0.43	G					93.2	lower expansa		93.2	lower expansa
D16	375.55	0.1	63.72	1.32	G					92	upper postera		92	upper postera
D15	390.14	0.14	49.89	0.97	G					91.5	lower postera		91.5	lower postera
D14	390.82	0.18	49.63	0.72	G					91.2	upper trachytera		91.2	upper trachytera
D13	394.29	0.1	44.73	1.01	G					90.9	lower trachytera		90.9	lower trachytera
D12	407.75	1.08	21.62	1.21	G					85.9	uppermost marginifera		85.9	uppermost marginifera
D11	411.7	0.9	12.94	2.78	G					84.6	upper marginifera		84.6	upper marginifera
D10	411.5	1.2	17.23	5.05	G					82.8	lower marginifera		82.8	lower marginifera
D9	415.6	0.8	4.04	2.63	G					81.1	upper rhomboidea		81.1	upper rhomboidea
D8	417.7	0.5	1.74	2.47	G					79.8	lower rhomboidea		79.8	lower rhomboidea
D7	417.22	0.21	4.38	1.52	G					79.2	uppermost crepida		79.2	uppermost crepida
D6	417.61	0.12	4.38	1.52	G					78.8	upper crepida		78.8	upper crepida
D5	417.68	0.21	4.38	1.52	G					77.6	middle crepida		77.6	middle crepida
D4	417.56	0.2	4.38	1.52	G					76.6	lower crepida		76.6	lower crepida
D3	417.73	0.22	4.38	1.52	G					74.9	upper triangularis		74.9	upper triangularis
D2	417.85	0.23	4.38	1.52	G					73.9	middle triangularis		73.9	middle triangularis
D1	418.42	0.21	4.38	1.52	G					73.2	lower triangularis		73.2	lower triangularis
S8	422.91	0.07	-4.62	0.4	G					70.9	Zone 13		72.4	linguiformis
S7	424.08	0.2	-6.49	0.49	G					69.3	Zone 12		70.4	upper rhenana
A-baseFamennian-D27	372.71	0.27	73.19	1.02	G					65.7	Zone 11		66.4	lower rhenana
A-baseFrasnian-D27	379.41	0.64	59.78	1.02	G					65.2	Zone 10		65.7	jamieae
A-baseGivetian-D27	384.32	0.76	52.42	1.02	G					65	Zone 9		65.1	upper hassi
A-baseEifelian-D27	389.82	0.88	45.74	1.02	G					64.2	Zone 8		63.4	lower hassi
A-baseCarboniferous-D15	363.36	0.78	100	0.5	G					63.4	Zone 7		62.4	punctata
A-baseFamennian-D15	377.18	0.76	73.19	0.5	G					63.1	Zone 6		61.5	transitans
A-baseFrasnian-D15	383.88	0.5	59.78	0.5	G					62.4	Zone 5		61.1	upper falsiovalis
A-baseGivetian-D15	388.79	0.29	52.42	0.5	G					61.5	Zone 4		59.8	lower falsiovalis
A-D15	390.14	0.14	50.61	0.5	G					61.1	Zone 3		58.1	disparilis
A-baseEifelian-D15	393.79	0.69	45.74	0.5	G					60.4	Zone 2		57.6	upper hermanni
A-baseCarboniferous-D14	362.43	0.92	100	0.5	G					59.8	Zone 1		57.4	lower hermanni
A-baseFamennian-D14	376.25	0.91	73.19	0.5	G					59.6	norrisi		57	upper varcus
A-baseFrasnian-D14	382.95	0.7	59.78	0.5	G					59	upper disparilis		55.2	middle varcus
A-baseGivetian-D14	387.86	0.57	52.42	0.5	G					58.1	lower disparilis		52.7	lower varcus
A-D14	390.82	0.18	48.47	0.5	G					57.6	upper hermanni		52.4	hemiansatus
A-baseEifelian-D14	392.86	0.42	45.74	0.5	G					57.4	lower hermanni		52	ensensis
A-baseCarboniferous-D13	363.36	0.86	100	1.01	G					57	latifossatus		50.9	kockelianus
A-baseFamennian-D13	377.18	0.84	73.19	1.01	G					55.2	ansatus		50.4	australis
A-baseFrasnian-D13	383.88	0.61	59.78	1.01	G					54.2	rhenanus		47.5	costatus
A-baseGivetian-D13	388.79	0.46	52.42	1.01	G					52.7	timorensis		45.7	partitus
A-baseEmsian-D6	411.53	2.02	15.73	1.52	G					52.4	hemiansatus		41.7	patulus
A-basePragian-D6	413.23	1.84	10.16	1.52	G					52	ensensis		32.1	serotinus
A-baseLochkovian-D6	420.94	1.4	0	1.52	G					51.8	eiflius		27	inversus
A-baseEmsian-D5	411.6	2.02	15.73	1.52	G					50.9	kockelianus		22.8	nothoperbonus
A-basePragian-D5	413.3	1.85	10.16	1.52	G					50.4	australis		22.3	upper excavatus
A-baseLochkovian-D5	421.01	1.41	0	1.52	G					47.5	costatus		18.6	middle excavatus
										45.7	partitus		18	lower excavatus
										41.7	patulus		15.7	kitabicus
										32.1	serotinus		13.9	pireneae
										22.8	laticostatus/inversus		12.2	kindlei
										18.6	gronbergi		10.2	sulcatus
										17.5	dehiscens		6.7	pesavis
										15.7	kitabicus sulcatus mu		4.2	delta
										12.2	kindlei		1.4	eurekaensis
										11.3	sulcatus kappa lambda		0	baseD
										10.2	irregularis		-0.7	postwoschmidti/woschmidti
										8.4	gilberti
										6.7	pandora beta
										5.9	alexii
										5.1	trigonicus
										4.8	eleanorae
										4.2	omoalpha
										2.4	sexidentata
										1.4	eurekaensis
										0	baseD
										-0.7	hesperius
										-3	detortus
										-4.6	eost. s.l. I.Z.
										-5	crispa
										-6	snajdri I.Z.
										-7	siluricus
										-7.7	ploeckensis
Notes: The four tables above or the corresponding .csv files available on GitHub (https://github.com/cohgeo/DevonianAgeDepthModel) are used as input into R script "DevonianAgeDepthModel.R" (available as additional supplementary material or on GitHub) which uses anchored astrochronology durations, radioisotopic ages, and relative stratigraphic positions to create an age-depth model to predict Stag…

## Sheet: Table S7
TABLE S7: R INPUT DATA FOR AGE-DEPTH MODELING OF BECKER 2012 SCALE
DevonianData_Becker2012.csv							DevonianPositions_Becker2012.csv			DevonianPositions_Becker 2012_conodont.csv
ids	age	uncertainty_2sig	midpoint	halfwidth	distTypes		predictPositions	ids		predictPositions	ids
Cb2	358.43	0.06	102.93	0.83	G		100	baseCarboniferous		105.4	baseNextZone
Cb1	358.71	0.06	101.05	1.05	G		77.86	baseFamennian		102.1	duplicata
D27	358.89	0.2	99.19	0.81	G		60.54	baseFrasnian		100	baseCb
D26	358.97	0.11	99.19	0.81	G		52.19	baseGivetian		100	sulcata
D25	359.25	0.06	99.19	0.81	G		43.03	baseEifelian		98.4	praesulcata
D23	362.87	0.53	97.37	1.01	G		19.29	baseEmsian		94.3	expansa
D22	364.08	2.05	97.37	1.01	G		13.96	basePragian		93.1	postera
D19	372.36	0.05	75.05	1.45	G		0	baseLochkovian		91.2	trachytera
D18	375.14	0.12	67.76	0.98	G					87	marginifera
D17	375.25	0.13	67.76	0.98	G					85.3	rhomboidea
D16	375.55	0.1	67.76	0.98	G					81.4	crepida
D15	390.14	0.14	48.66	0.99	G					77.9	triangularis
D14	390.82	0.18	48.66	0.99	G					76.5	linguiformis
D13	394.29	0.1	42.47	0.52	G					70.7	rhenana
D12	407.75	1.08	23.77	2.1	G					66.8	hassi
D11	411.7	0.9	16.63	2.66	G					64.3	punctata
D10	411.5	1.2	19.24	4.34	G					62.9	transitans
D9	415.6	0.8	6.95	3.79	G					59.8	guanwushanensis (falsiovalis)
D8	417.7	0.5	3.84	3.84	G					58.1	disparilis
D7	417.22	0.21	8.28	2.46	G					56.7	hermanni
D6	417.61	0.12	8.28	2.46	G					52.8	varcus
D5	417.68	0.21	8.28	2.46	G					52.1	hemiansatus
D4	417.56	0.2	8.28	2.46	G					51.4	ensensis
D3	417.73	0.22	8.28	2.46	G					49.7	kockelianus
D2	417.85	0.23	8.28	2.46	G					45.7	costatus
D1	418.42	0.21	8.28	2.46	G					43	partitus
S8	422.91	0.07	-6.31	0.65	G					40.2	patulus
S7	424.08	0.2	-9.33	0.8	G					35.6	serotinus
A-baseFamennian-D27	372.71	0.27	77.88	0.81	G					30.4	inversus
A-baseFrasnian-D27	379.41	0.64	60.54	0.81	G					25.9	nothoperbonus
A-baseGivetian-D27	384.32	0.76	52.19	0.81	G					24.2	gronbergi
A-baseEifelian-D27	389.82	0.88	43.03	0.81	G					21.7	excavatus
A-baseCarboniferous-D15	363.36	0.78	100	0.5	G					19.2	kitabicus
A-baseFamennian-D15	377.18	0.76	77.88	0.5	G					17.6	pireneae
A-baseFrasnian-D15	383.88	0.5	60.54	0.5	G					14.9	kindlei
A-baseGivetian-D15	388.79	0.29	52.19	0.5	G					13	irregularis
A-D15	390.14	0.14	49.71	0.5	G					12.1	gilberti
A-baseEifelian-D15	393.79	0.69	43.03	0.5	G					10.7	pandora beta
A-baseCarboniferous-D14	362.43	0.92	100	0.5	G					9.4	trigonicus
A-baseFamennian-D14	376.25	0.91	77.88	0.5	G					8.6	transitans
A-baseFrasnian-D14	382.95	0.7	60.54	0.5	G					7.7	eleanorae
A-baseGivetian-D14	387.86	0.57	52.19	0.5	G					6.3	omoalpha
A-D14	390.82	0.18	46.77	0.5	G					3.2	postwoschmidti
A-baseEifelian-D14	392.86	0.42	43.03	0.5	G					0	hesperius
A-baseCarboniferous-D13	363.36	0.86	100	0.52	G					0	baseD
A-baseFamennian-D13	377.18	0.84	77.88	0.52	G					-3.6	detortus
A-baseFrasnian-D13	383.88	0.61	60.54	0.52	G					-6.3	eost. s.l. I.Z.
A-baseGivetian-D13	388.79	0.46	52.19	0.52	G					-7	crispa
A-baseEmsian-D6	412.78	1.54	19.28	2.46	G					-8.5	snajdri I.Z.
A-basePragian-D6	414.48	1.32	13.96	2.46	G					-10.1	siluricus
A-baseLochkovian-D6	422.18	1.92	0	2.46	G					-11.3	ploeckensis
A-baseEmsian-D5	412.85	1.56	19.28	2.46	G
A-basePragian-D5	414.55	1.33	13.96	2.46	G
A-baseLochkovian-D5	422.24	1.93	0	2.46	G
Notes: The three tables above or the corresponding .csv files available on GitHub (https://github.com/cohgeo/DevonianAgeDepthModel) are used as input into R script "DevonianAgeDepthModel.R" (available as additional supplementary material or on GitHub) which uses anchored astrochronology durations, radioisotopic ages, and relative stratigraphic positions to create an age-depth model to predict Sta…

## Sheet: Table S8
TABLE S8: R INPUT DATA FOR AGE-DEPTH MODELING OF BECKER 2020 SCALE
DevonianData_Becker2020.csv							DevonianPositions_Becker2020.csv			DevonianPositions_Becker 2020_conodont.csv
ids	age	uncertainty_2sig	midpoint	halfwidth	distTypes		predictPositions	ids		predictPositions	ids
Cb2	358.43	0.06	101.76	0.44	G		100	baseCarboniferous		105	baseNextZone
Cb1	358.71	0.06	100.66	0.66	G		80.24	baseFamennian		102.8	sandbergi
D27	358.89	0.2	98.96	0.35	G		67.18	baseFrasnian		102.2	upper duplicata
D26	358.97	0.11	98.21	0.39	G		56.45	baseGivetian		101.3	lower duplicata
D25	359.25	0.06	97.82	0.79	G		41.38	baseEifelian		100	baseCb
D23	362.87	0.53	95.25	0.59	G		19.58	baseEmsianNew		100	sulcata
D22	364.08	2.05	95.25	0.59	G		14.22	baseEmsian		99.3	kockeli
D19	372.36	0.05	78.76	0.48	G		11.06	basePragian		98.6	Bi. costatus - kockeli Interregnum
D18	375.14	0.12	73.9	0.46	G		0	baseLochkovian		97	praesulcata
D17	375.25	0.13	74.75	0.39	G					95.8	ultimus
D16	375.55	0.1	74.75	0.39	G					94.7	Bi. costatus
D15	390.14	0.14	48.37	2.77	G					94.3	aculeatus
D14	390.82	0.18	47.41	1.81	G					93.1	expansa
D13	394.29	0.1	40.83	0.55	G					92	manca
D12	407.75	1.08	24.34	0.7	G					90.9	styriacus
D11	411.7	0.9	12.64	1.58	G					90	sigmoidalis
D10	411.5	1.2	12.64	1.58	G					89.6	granulosus
D9	415.6	0.8	3	3	G					88.7	trachytera
D8	417.7	0.5	3	3	G					87.8	velifer
D7	417.22	0.21	3.39	1.13	G					86.7	utahensis
D6	417.61	0.12	3.39	1.13	G					85.6	marginifera
D5	417.68	0.21	3.39	1.13	G					85	gracilis
D4	417.56	0.2	3.39	1.13	G					84.4	rhomboidea
D3	417.73	0.22	3.39	1.13	G					83.8	pectinata
D2	417.85	0.23	3.39	1.13	G					83.2	prima
D1	418.42	0.21	3.39	1.13	G					82.6	termini
S8	422.91	0.07	-6.11	0.72	G					82	crepida
S7	424.08	0.2	-8.76	0.68	G					81.4	minuta
A-baseFamennian-D27	372.71	0.27	80.23	0.69	G					80.8	platys
A-baseFrasnian-D27	379.41	0.64	67.17	0.69	G					80.5	triangularis
A-baseGivetian-D27	384.32	0.76	56.45	0.69	G					80.2	subperlobata
A-baseEifelian-D27	389.82	0.88	41.37	0.69	G					80.1	ultima
A-baseCarboniferous-D15	363.36	0.78	100	0.5	G					79.2	linguiformis
A-baseFamennian-D15	377.18	0.76	80.23	0.5	G					78.3	bogartensis
A-baseFrasnian-D15	383.88	0.5	67.17	0.5	G					77.2	winchelli
A-baseGivetian-D15	388.79	0.29	56.45	0.5	G					76.3	feisti
A-D15	390.14	0.14	52.36	0.5	G					75.7	plana
A-baseEifelian-D15	393.79	0.69	41.37	0.5	G					75.1	proversa
A-baseCarboniferous-D14	362.43	0.92	100	0.5	G					74.4	housei
A-baseFamennian-D14	376.25	0.91	80.23	0.5	G					73.4	nonaginta
A-baseFrasnian-D14	382.95	0.7	67.17	0.5	G					72.5	primus
A-baseGivetian-D14	387.86	0.57	56.45	0.5	G					71.4	punctata
A-D14	390.82	0.18	47.53	0.5	G					71.1	nodosa
A-baseEifelian-D14	392.86	0.42	41.37	0.5	G					70.1	transitans
A-baseCarboniferous-D13	363.36	0.86	100	0.55	G					69	rugosa
A-baseFamennian-D13	377.18	0.84	80.23	0.55	G					68.6	rotundiloba
A-baseFrasnian-D13	383.88	0.61	67.17	0.55	G					68.2	soluta
A-baseGivetian-D13	388.79	0.46	56.45	0.55	G					67.2	pristina
A-baseEmsian-D6	410.57	2.39	14.22	1.13	G					66.7	norrisi
A-basePragian-D6	412.27	2.25	11.06	1.13	G					66.5	dengleri
A-baseLochkovian-D6	419.97	1	0	1.13	G					66.2	sagitta
A-baseEmsian-D5	410.64	2.39	14.22	1.13	G					65.8	disparilis
A-basePragian-D5	412.34	2.25	11.06	1.13	G					65.3	ectypus
A-baseLochkovian-D5	420.04	1.02	0	1.13	G					64.8	hermanni
										63.8	semialternans
										61.8	ansatus
										60.2	rhenanus - varcus
										58.4	timorensis
										56.5	hemiansatus
										54.5	ensensis
										53.1	eiflius
										51.1	kockelianus
										49.2	australis
										46.8	pseudofoliatus
										44.4	P. costatus
										41.4	partitus
										39.2	patulus
										37	cooperi
										34.8	serotinus
										31.1	laticostatus
										28.5	inversus
										26.1	catharinae
										25	nothoperbonus
										22.2	gronbergi
										19.6	excavatus (M114)
										16.9	excavatus s. str.
										14.2	kitabicus
										13.6	serratus
										12	profunda
										10.9	irregularis
										9.6	gilberti
										8.5	pandora beta
										8	kutscheri
										7.4	trigonicus
										6.7	eleanorae
										6	transitans
										5.1	eoeleanorae
										4.5	carlsi
										3.8	omoalpha
										2.3	postwoschmidti
										0	hesperius
										0	baseD
										-2.9	detortus
										-6.2	eost. s.l. I.Z.
										-6.8	crispa
										-8.1	snajdri I.Z.
										-9.4	siluricus
										-10.1	ploeckensis
Notes: The three tables above or the corresponding .csv files available on GitHub (https://github.com/cohgeo/DevonianAgeDepthModel) are used as input into R script "DevonianAgeDepthModel.R" (available as additional supplementary material or on GitHub) which uses anchored astrochronology durations, radioisotopic ages, and relative stratigraphic positions to create an age-depth model to predict Sta…

## Sheet: Table S9
TABLE S9: AGE-DEPTH MODEL RESULTS: RECALIBRATED CONODONT BIOZONES OF THE KAUFMANN SCALE
Revised Kaufmann alternative scale				Revised Kaufmann standard scale
Conodont biozone	Posterior age	Recalibrated scaled stratigraphic position, base of biozone		Conodont biozone	Posterior age	Recalibrated scaled stratigraphic position, base of biozone
	(Ma)				(Ma)
duplicata	358.62 +0.17 / -0.18	100.4		duplicata	358.62 +0.17 / -0.18	100.4
sulcata	358.88 +0.23 / -0.23	100		sulcata	358.88 +0.23 / -0.23	100
upper praesulcata	358.98 +0.20 / -0.23	99.8		upper praesulcata	358.98 +0.20 / -0.23	99.8
middle praesulcata	359.75 +1.53 / -0.52	98.6		middle praesulcata	359.75 +1.53 / -0.52	98.6
lower praesulcata	361.54 +1.30 / -1.32	95.7		lower praesulcata	361.54 +1.30 / -1.32	95.7
upper expansa	362.91 +1.24 / -1.22	93.4		upper expansa	362.91 +1.24 / -1.22	93.4
middle expansa	363.09 +1.29 / -1.25	93.1		middle expansa	363.09 +1.29 / -1.25	93.1
lower expansa	363.67 +1.44 / -1.34	92.2		lower expansa	363.67 +1.44 / -1.34	92.2
upper postera	364.17 +1.54 / -1.47	91.4		upper postera	364.17 +1.54 / -1.47	91.4
lower postera	364.39 +1.55 / -1.48	91		lower postera	364.39 +1.55 / -1.48	91
upper trachytera	364.51 +1.55 / -1.51	90.8		upper trachytera	364.51 +1.55 / -1.51	90.8
lower trachytera	364.63 +1.58 / -1.51	90.6		lower trachytera	364.63 +1.58 / -1.51	90.6
uppermost marginifera	366.75 +1.65 / -1.71	87.1		uppermost marginifera	366.75 +1.65 / -1.71	87.1
upper marginifera	367.30 +1.62 / -1.70	86.2		upper marginifera	367.30 +1.62 / -1.70	86.2
lower marginifera	368.06 +1.52 / -1.67	85		lower marginifera	368.06 +1.52 / -1.67	85
upper rhomboidea	368.79 +1.41 / -1.60	83.8		upper rhomboidea	368.79 +1.41 / -1.60	83.8
lower rhomboidea	369.34 +1.32 / -1.54	82.9		lower rhomboidea	369.34 +1.32 / -1.54	82.9
uppermost crepida	369.58 +1.27 / -1.49	82.5		uppermost crepida	369.58 +1.27 / -1.49	82.5
upper crepida	369.75 +1.22 / -1.45	82.2		upper crepida	369.75 +1.22 / -1.45	82.2
middle crepida	370.27 +1.06 / -1.37	81.4		middle crepida	370.27 +1.06 / -1.37	81.4
lower crepida	370.70 +0.92 / -1.24	80.7		lower crepida	370.70 +0.92 / -1.24	80.7
upper triangularis	371.42 +0.58 / -0.97	79.5		upper triangularis	371.42 +0.58 / -0.97	79.5
middle triangularis	371.90 +0.39 / -0.75	78.7		middle triangularis	371.90 +0.39 / -0.75	78.7
lower triangularis	372.16 +0.30 / -0.50	78.3		lower triangularis	372.16 +0.30 / -0.50	78.3
Zone 13	372.62 +0.80 / -0.30	77.5		linguiformis	372.33 +0.25 / -0.23	78
Zone 12	373.29 +0.86 / -0.65	76.4		upper rhenana	372.84 +0.84 / -0.43	77.2
Zone 11	374.70 +0.44 / -0.70	74.1		lower rhenana	374.43 +0.57 / -0.78	74.6
Zone 10	374.90 +0.33 / -0.61	73.8		jamieae	374.70 +0.44 / -0.70	74.1
Zone 9	375.00 +0.29 / -0.58	73.6		upper hassi	374.95 +0.31 / -0.59	73.7
Zone 8	375.29 +0.33 / -0.26	73.2		lower hassi	375.77 +2.12 / -0.51	72.4
Zone 7	375.77 +2.12 / -0.51	72.4		punctata	377.39 +2.61 / -1.68	69.7
Zone 6	376.19 +2.44 / -0.87	71.7		transitans	379.05 +2.18 / -2.34	67
Zone 5	377.39 +2.61 / -1.68	69.7		upper falsiovalis	379.78 +1.90 / -2.45	65.8
Zone 4	379.05 +2.18 / -2.34	67		lower falsiovalis	382.14 +1.50 / -2.03	62
Zone 3	379.78 +1.90 / -2.45	65.8		disparilis	383.81 +1.46 / -1.40	59.2
Zone 2	381.29 +1.57 / -2.54	63.4		upper hermanni	384.13 +1.54 / -1.42	58.7
Zone 1	382.14 +1.50 / -2.03	62		lower hermanni	384.26 +1.55 / -1.45	58.5
norrisi	382.37 +1.49 / -1.84	61.6		upper varcus	384.53 +1.56 / -1.51	58.1
upper disparilis	383.07 +1.45 / -1.45	60.4		middle varcus	385.72 +1.42 / -1.60	56.1
lower disparilis	383.81 +1.46 / -1.40	59.2		lower varcus	387.79 +1.05 / -1.62	52.7
upper hermanni	384.13 +1.54 / -1.42	58.7		hemiansatus	388.08 +1.05 / -1.42	52.3
lower hermanni	384.26 +1.55 / -1.45	58.5		ensensis	388.46 +1.05 / -1.27	51.6
latifossatus	384.53 +1.56 / -1.51	58.1		kockelianus	389.77 +0.45 / -0.83	49.5
ansatus	385.72 +1.42 / -1.60	56.1		australis	390.14 +0.39 / -0.52	48.9
rhenanus	386.41 +1.24 / -1.63	55		costatus	391.57 +0.95 / -0.63	46.5
timorensis	387.79 +1.05 / -1.62	52.7		partitus	393.09 +1.00 / -1.29	44
hemiansatus	388.08 +1.05 / -1.42	52.3		patulus	395.92 +1.77 / -1.29	39.4
ensensis	388.46 +1.05 / -1.27	51.6		serotinus	401.34 +2.45 / -2.34	30.6
eiflius	388.68 +0.97 / -1.17	51.3		inversus	404.22 +2.34 / -2.36	25.9
kockelianus	389.77 +0.45 / -0.83	49.5		nothoperbonus	406.62 +2.03 / -2.21	21.9
australis	390.14 +0.39 / -0.52	48.9		upper excavatus	406.94 +2.07 / -2.20	21.4
costatus	391.57 +0.95 / -0.63	46.5		middle excavatus	408.90 +2.29 / -2.21	18.2
partitus	393.09 +1.00 / -1.29	44		lower excavatus	409.12 +2.23 / -2.23	17.8
patulus	395.92 +1.77 / -1.29	39.4		kitabicus	410.44 +2.12 / -2.44	15.7
serotinus	401.34 +2.45 / -2.34	30.6		pireneae	411.71 +2.04 / -2.12	13.6
laticostatus/inversus	406.62 +2.03 / -2.21	21.9		kindlei	412.43 +1.91 / -2.04	12.4
gronbergi	408.90 +2.29 / -2.21	18.2		sulcatus	413.83 +1.89 / -2.17	10.1
dehiscens	409.31 +2.19 / -2.29	17.5		pesavis	416.19 +0.87 / -1.52	6.3
kitabicus sulcatus µ	410.44 +2.12 / -2.44	15.7		delta	417.67 +0.48 / -0.49	3.8
kindlei	412.43 +1.91 / -2.04	12.4		eurekaensis	418.96 +1.49 / -0.86	1.7
sulcatus κλ	412.96 +1.93 / -2.13	11.6		postwoschmidti/woschmidti	420.61 +1.43 / -1.57	-1
irregularis	413.83 +1.89 / -2.17	10.1
gilberti	415.16 +1.32 / -1.86	8
pandora β	416.19 +0.87 / -1.52	6.3
alexii	416.74 +0.61 / -1.35	5.4
trigonicus	417.35 +0.42 / -0.97	4.4
eleanorae	417.47 +0.42 / -0.77	4.2
omoalpha	417.67 +0.48 / -0.49	3.8
sexidentata	418.51 +1.30 / -0.59	2.5
eurekaensis	418.96 +1.49 / -0.86	1.7
hesperius	420.61 +1.43 / -1.57	-1
detortus	422.02 +0.71 / -1.30	-3.3
eost. s.l. I.Z.	422.90 +0.46 / -0.59	-4.7
crispa	423.14 +0.59 / -0.28	-5.1
snajdri I.Z.	423.73 +0.52 / -0.54	-6.1
siluricus	424.36 +0.96 / -0.52	-7.1
ploeckensis	424.72 +1.19 / -0.70	-7.7

## Sheet: Table S10
TABLE S10: AGE-DEPTH MODEL RESULTS: RECALIBRATED CONODONT BIOZONES OF THE BECKER 2012 SCALE
Revised Becker 2012 scale
Conodont biozone	Posterior age	Recalibrated scaled stratigraphic position, base of biozone
	(Ma)
duplicata	358.54 +0.17 / -0.19	100.7
sulcata	358.96 +0.20 / -0.22	100
praesulcata	359.94 +1.61 / -0.60	98.4
expansa	363.59 +1.84 / -1.74	92.5
postera	364.21 +1.93 / -1.87	91.5
trachytera	365.19 +1.96 / -1.96	89.9
marginifera	367.36 +1.88 / -1.96	86.3
rhomboidea	368.25 +1.71 / -1.93	84.9
crepida	370.29 +1.15 / -1.58	81.6
triangularis	372.14 +0.24 / -0.47	78.6
linguiformis	372.35 +0.13 / -0.16	78.2
rhenana	374.15 +0.72 / -0.86	75.3
hassi	375.93 +1.63 / -0.53	72.4
punctata	378.36 +2.07 / -1.77	68.5
transitans	379.67 +1.83 / -1.91	66.4
guanwushanensis (falsiovalis)	383.21 +1.24 / -1.18	60.6
disparilis	384.21 +1.41 / -1.35	59
hermanni	384.99 +1.44 / -1.44	57.7
varcus	387.32 +0.97 / -1.41	53.9
hemiansatus	388.07 +0.91 / -1.22	52.7
ensensis	388.79 +0.77 / -0.87	51.5
kockelianus	390.03 +0.33 / -0.64	49.5
costatus	391.53 +0.90 / -0.57	47.1
partitus	393.34 +0.84 / -1.20	44.2
patulus	395.87 +1.95 / -1.34	40
serotinus	399.17 +2.72 / -2.36	34.7
inversus	402.90 +2.88 / -2.76	28.6
nothoperbonus	406.20 +2.53 / -2.82	23.3
gronbergi	407.43 +2.38 / -2.78	21.3
excavatus	409.24 +2.20 / -2.32	18.3
kitabicus	410.90 +2.16 / -2.49	15.6
pireneae	411.97 +2.05 / -2.30	13.9
kindlei	413.85 +2.17 / -2.14	10.8
irregularis	415.18 +1.57 / -2.26	8.7
gilberti	415.81 +1.16 / -2.16	7.7
pandora β	416.80 +0.52 / -1.45	6
trigonicus	417.41 +0.38 / -0.80	5.1
transitans	417.57 +0.38 / -0.48	4.8
eleanorae	417.75 +0.47 / -0.40	4.5
omoalpha	418.11 +0.96 / -0.40	3.9
postwoschmidti	418.92 +1.56 / -0.80	2.6
hesperius	420.52 +1.64 / -1.67	0
detortus	422.03 +0.70 / -1.30	-2.4
eost. s.l. I.Z.	422.92 +0.46 / -0.53	-3.9
crispa	423.19 +0.58 / -0.30	-4.3
snajdri I.Z.	423.76 +0.51 / -0.54	-5.3
siluricus	424.51 +1.15 / -0.61	-6.5
ploeckensis	425.09 +1.45 / -0.90	-7.4

[truncated: 1 more sheets: Table S11]
